# Supplementary material for: Composition-based classification of short metagenomic sequences elucidates the landscapes of taxonomic and functional enrichment of microorganisms
Source: PubMed Central journal article supplement — Nucleic Acids Res. 2012 Aug 31;41(1):e3. doi: 10.1093/nar/gks828 (PMC3592448; doi:10.1093/nar/gks828), 2012-08-31
Supplement: supp_gks828_nar-00760-met-k-2012-File007.pdf [file supp_gks828_nar-00760-met-k-2012-File007.pdf]

# SUPPLEMENTARY INFORMATION

## SUPPLEMENTARY FIGURES

- Supplementary Figure S1.** The pipeline of taxonomic/functional classification on short NGS reads by MetaCV.
- Supplementary Figure S2.** Comparisons of read number assigned under or upon genus level by using MetaCV and BlastX.
- Supplementary Figure S3.** Identity distribution of paired homologous genes between *Anabaena variabilis* and two reference organisms.
- Supplementary Figure S4.** Display of the relationship between average identities of homologous protein pairs and its classification accuracy MetaCV achieved.
- Supplementary Figure S5.** Display of the relationship between composition score of MetaCV and BlastX identities on 100 bp short reads classification.
- Supplementary Figure S6.** Distribution of composition scores of simulated short reads from human chromosome 1 against prokaryotic genes.
- Supplementary Figure S7.** Relative abundance of taxonomic groups on 109 cohorts.
- Supplementary Figure S8.** Relative abundance of 30 most enriched genera on 16 cohorts.
- Supplementary Figure S9.** Relative abundance of 30 most enriched functional categories from KEGG on 16 cohorts.
- Supplementary Figure S10.** Relative abundance of top 10 enriched genera and functional groups for 70 cohorts from healthy people.
- Supplementary Figure S11.** Correlation analysis between pairs of function groups and pairs of genera on 70 cohorts from guts of healthy human.
- Supplementary Figure S12.** Comparison of sensitivities and specificities of MetaCV, Phymm, BlastX and RAPSearch2 on a genus-mask testing.
- Supplementary Figure S13.** Time consumed by MetaCV on classification of short reads by using different oligopeptide lengths.
- Supplementary Figure S14.** Comparison of sensitivities and specificities of MetaCV by using different oligopeptide lengths.

## SUPPLEMENTARY TABLES

- Supplementary Table S1.** Performance comparison of MetaCV, Phymm, BlastX and RAPSearch2 on the classification of 100bp simulated reads from 154 genera.
- Supplementary Table S2.** Species-mask comparison of MetaCV, Phymm, BlastX and RAPSearch2 on the classification of simulated reads of various lengths.
- Supplementary Table S3.** Performance comparison of MetaCV, Phymm, BlastX and RAPSearch2 on the classification of “randomized metagenomic” data sets.
- Supplementary Table S4.** A list of 44 most abundant genera by MetaCV on 109 cohorts of human gut samples.

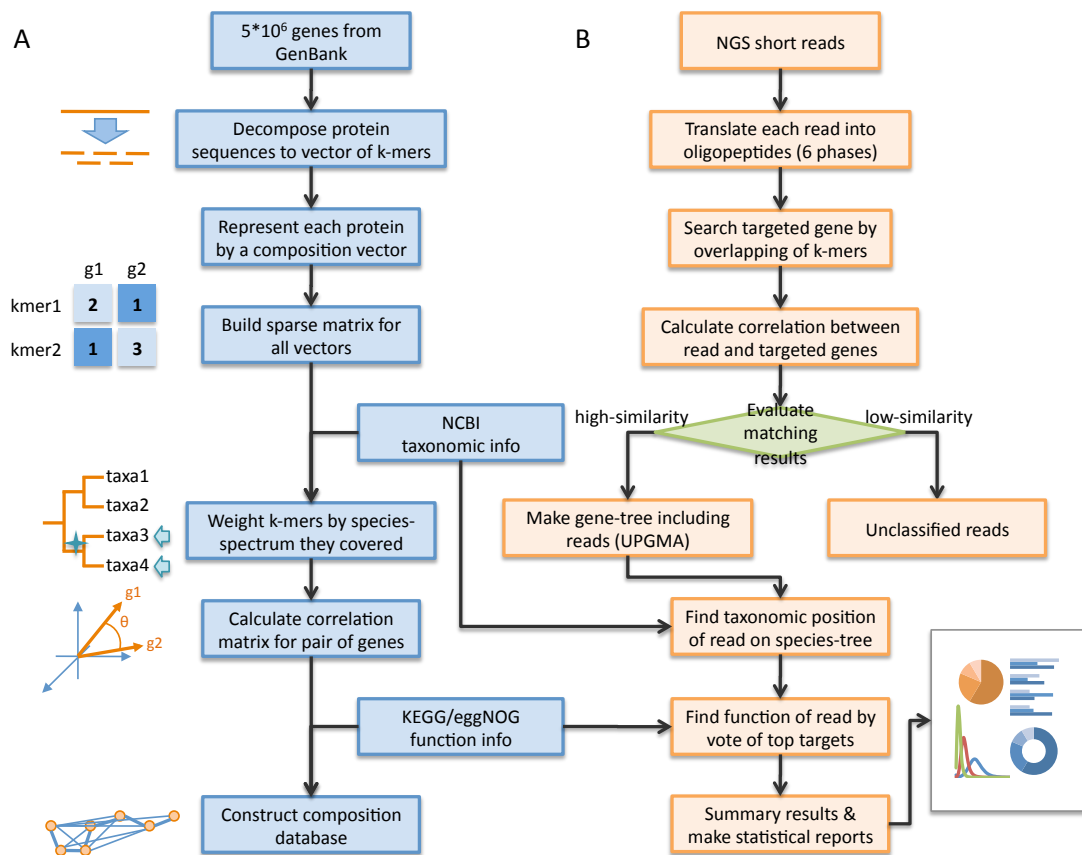

**Supplementary Figure S1.** The pipeline of taxonomic/functional classification on short NGS reads by MetaCV. (A) The workflow of reference database construction. (B) The comparison steps of NGS reads against reference genes.

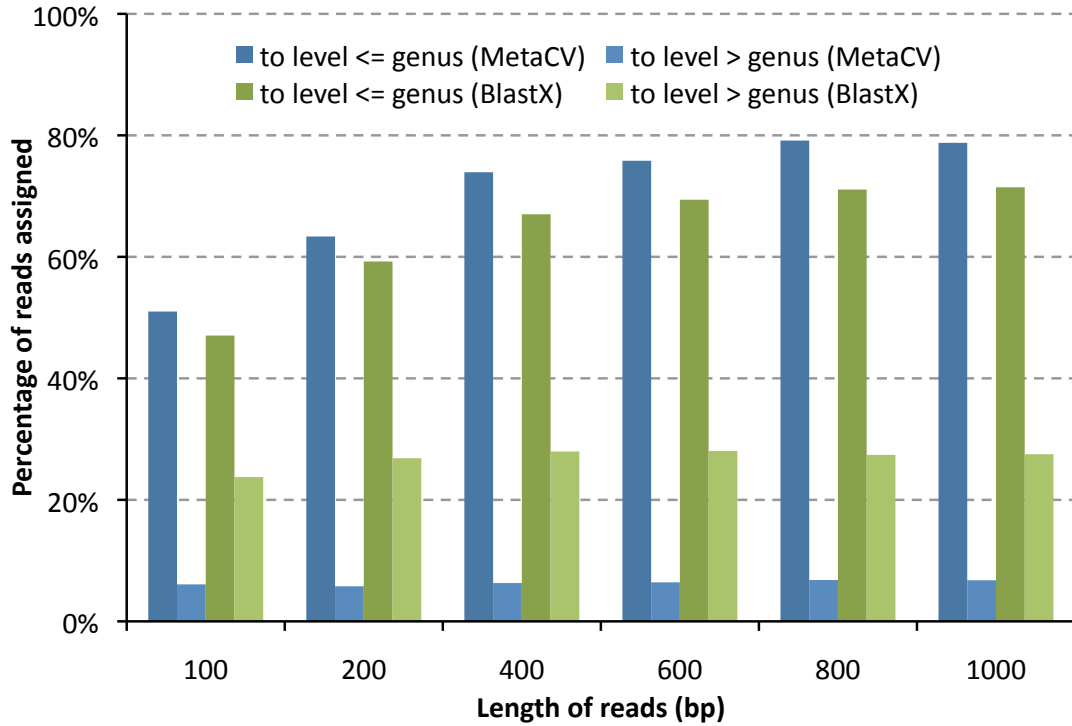

**Supplementary Figure S2.** Comparisons of read number assigned under or upon genus level by using MetaCV (blue) and BlastX (green) on the species-mask testing (the Dataset 1, see Materials and Methods).

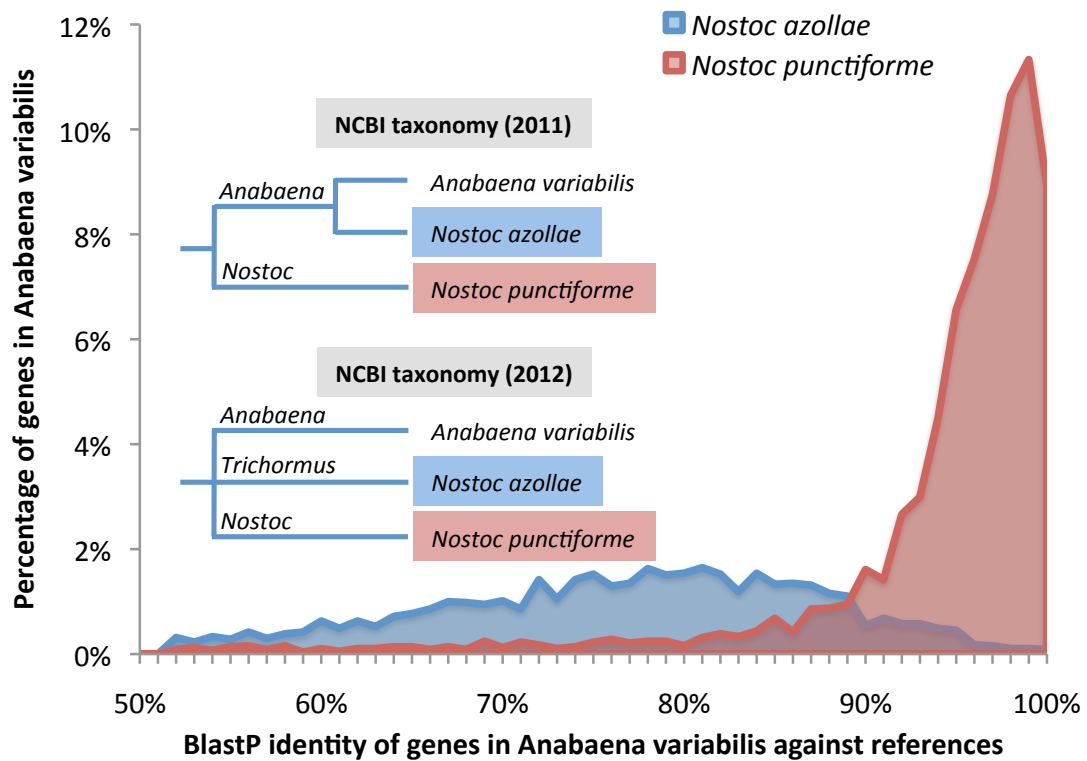

**Supplementary Figure S3.** Identity distribution of paired homologous genes between *Anabaena variabilis* ATCC 29413 and two reference organisms, *Nostoc azollae* 0708 (in blue) and *Nostoc punctiforme* PCC 73102 (in red). Taxonomic relationships of the three organisms from NCBI in both 2011 and 2012 are given above.

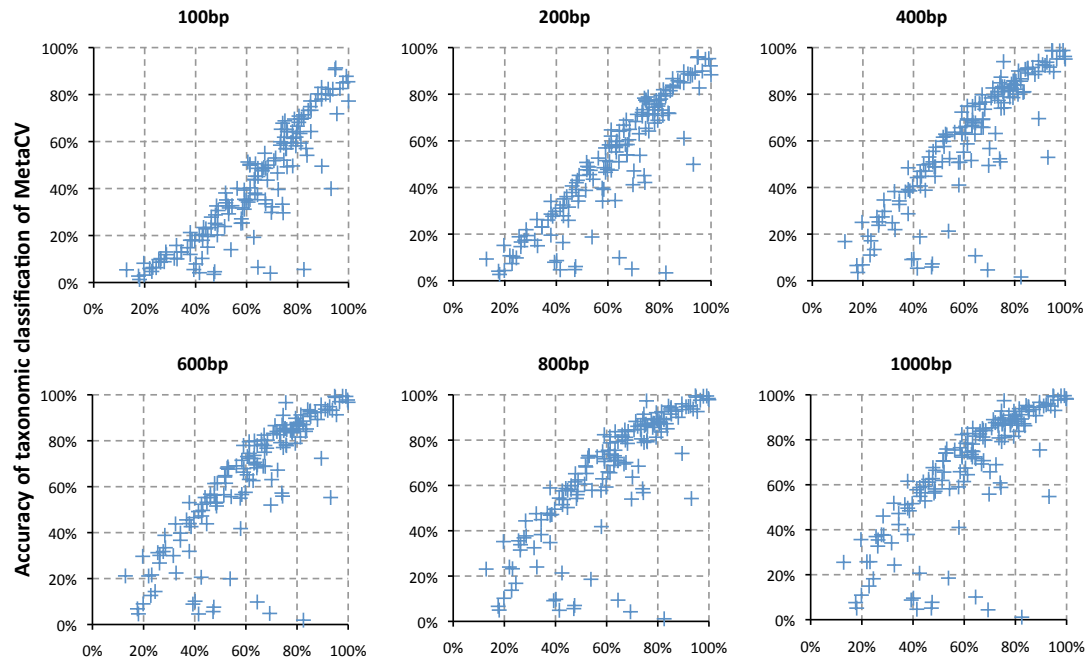

Average blast identity of homologous proteins between species within the same genus

**Supplementary Figure S4.** Display of the relationship between average identities of homologous protein pairs (by BlastP) and its classification accuracy MetaCV achieved. Each dot denotes one species. The more similar of the sequences between the species within a genus, the more accurately MetaCV could assign the reads.

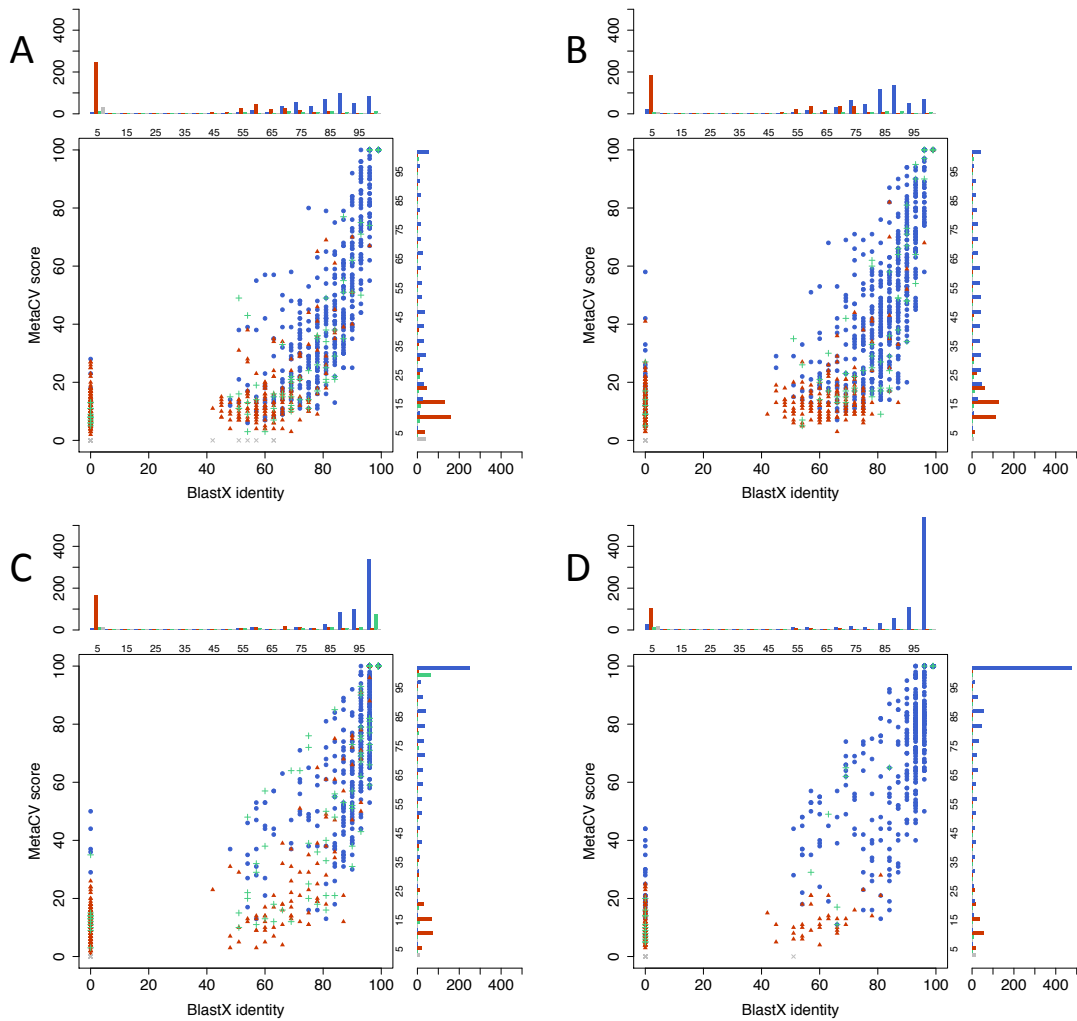

**Supplementary Figure S5.** Display of the relationship between composition scores of MetaCV and BlastX identities on 100 bp short reads classification (on the species-mask comparison) from (A) *Leuconostoc* which has a 60% protein similarity on average to its sister species, while (B) *Pyrobaculum*, (C) *Pectobacterium* and (D) *Caldicellulosiruptor* have 70%, 80% and 90% to their sister species respectively. Reads, correctly assigned by MetaCV, are represented by blue dots, while red and green dots denote reads mistakenly classified or assigned to taxa higher than genus level, respectively. Gray dots denote reads with no hits by MetaCV. In each sub-figure, distributions of reads on BlastX identities are displayed on the top and that on MetaCV scores are given in the right.

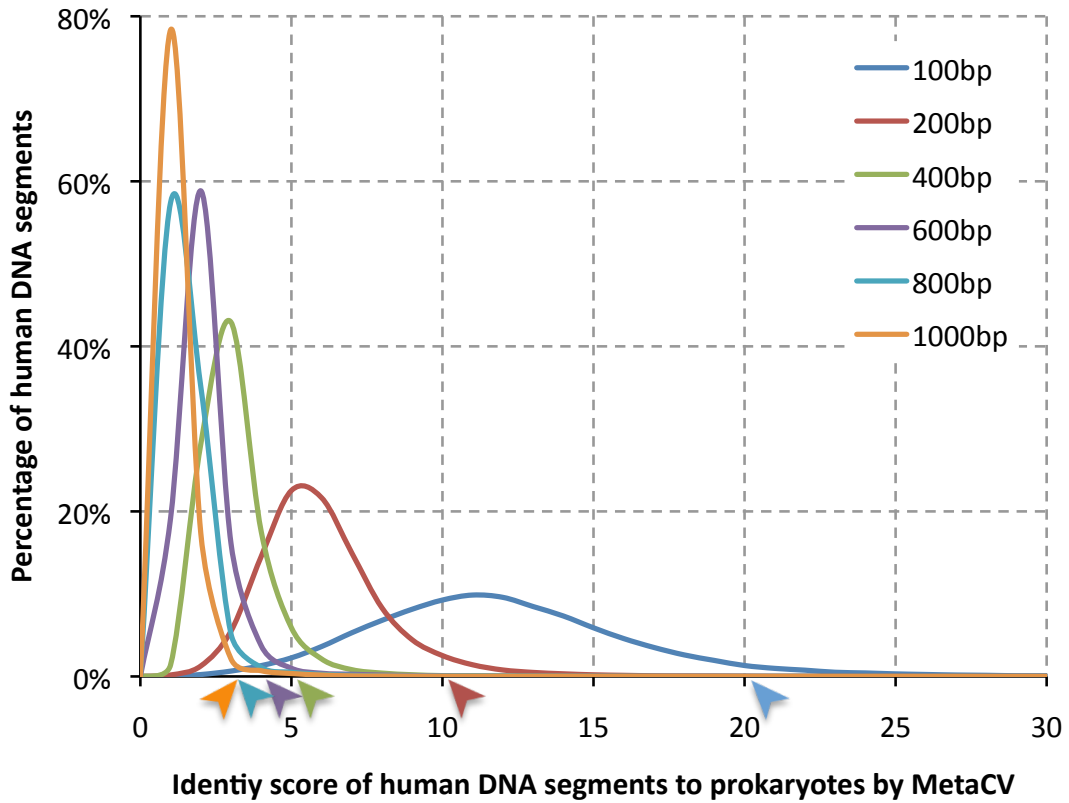

**Supplementary Figure S6.** Distribution of composition scores of simulated short reads from human chromosome 1 against  $5 \times 10^6$  genes from 1691 prokaryotic organisms assigned by MetaCV. Cutoff value of composition score could be set as 20 for 100 bp, 10 for 200 bp, 5 for 400 bp, 4 for 600 bp, 3 for both 800 and 1 kb read binning, as indicated by the arrows below, to control the false positive rate to lower than 5%.

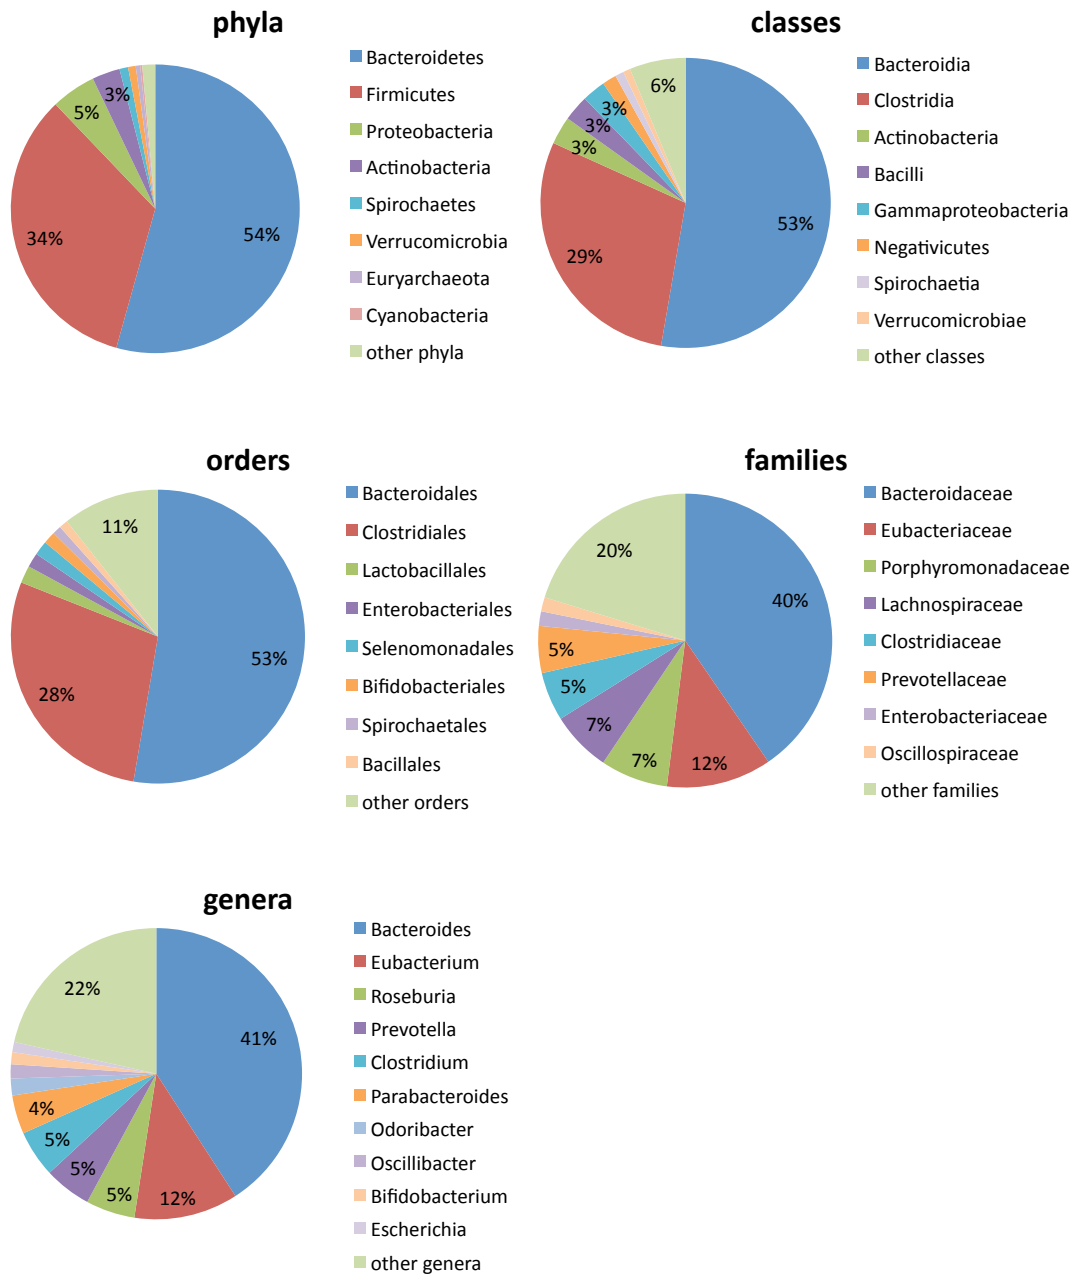

**Supplementary Figure S7.** Relative abundance of taxonomic groups from phylum to genus on 109 cohorts of human gut samples on average.



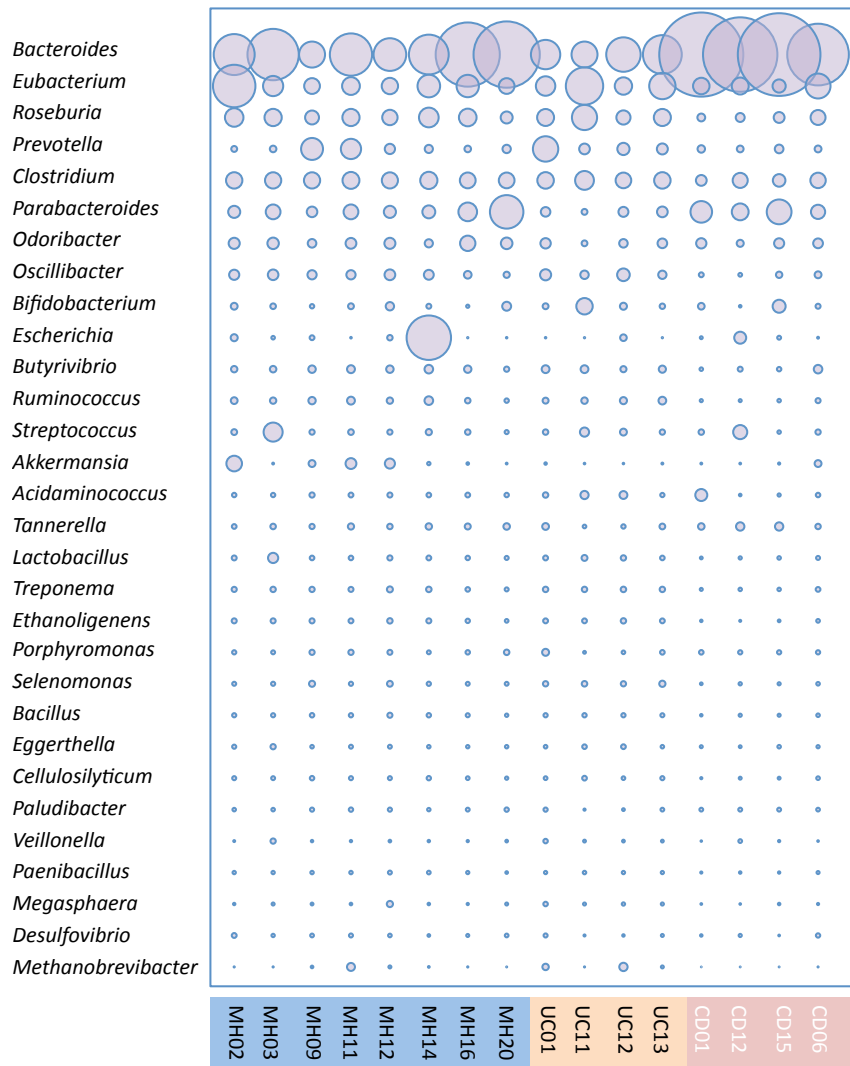

**Supplementary Figure S8.** Relative abundance of 30 most enriched genera on 16 cohorts, among which 8 samples are from healthy human (in blue), 4 samples are from ulcerative colitis patients (UC in orange) and 4 from Crohn's disease (CD in pink).

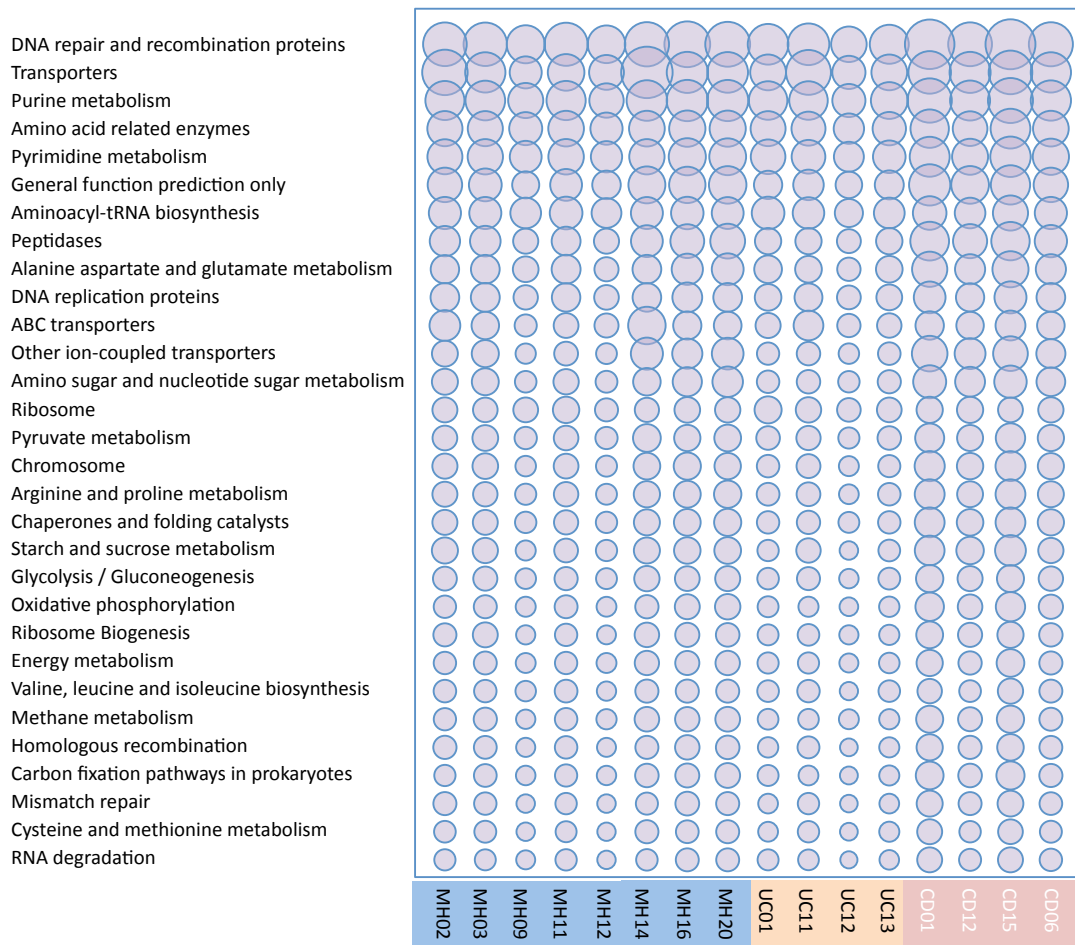

**Supplementary Figure S9.** Relative abundance of 30 most enriched functional categories from KEGG on 16 cohorts, samples are the same with those in Figure S8.

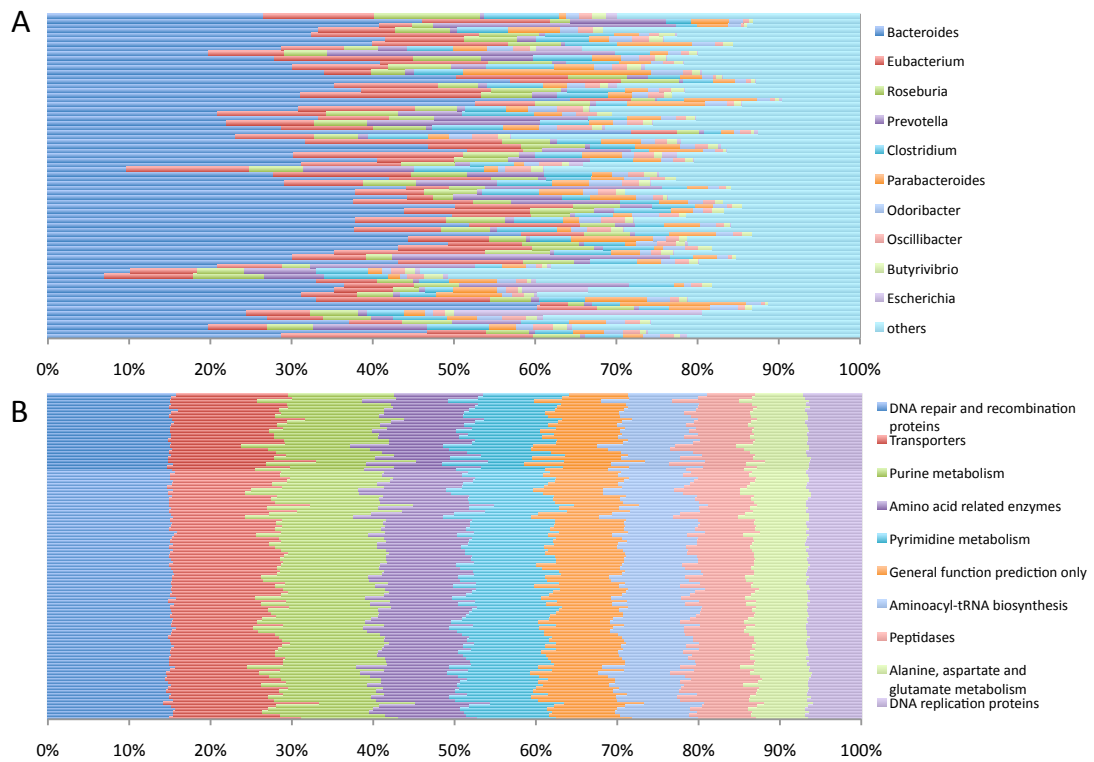

**Supplementary Figure S10.** Relative abundance of top 10 enriched genera (upper figure) and functional groups (lower figure) for 70 cohorts of healthy people. Each line stands for one sample.

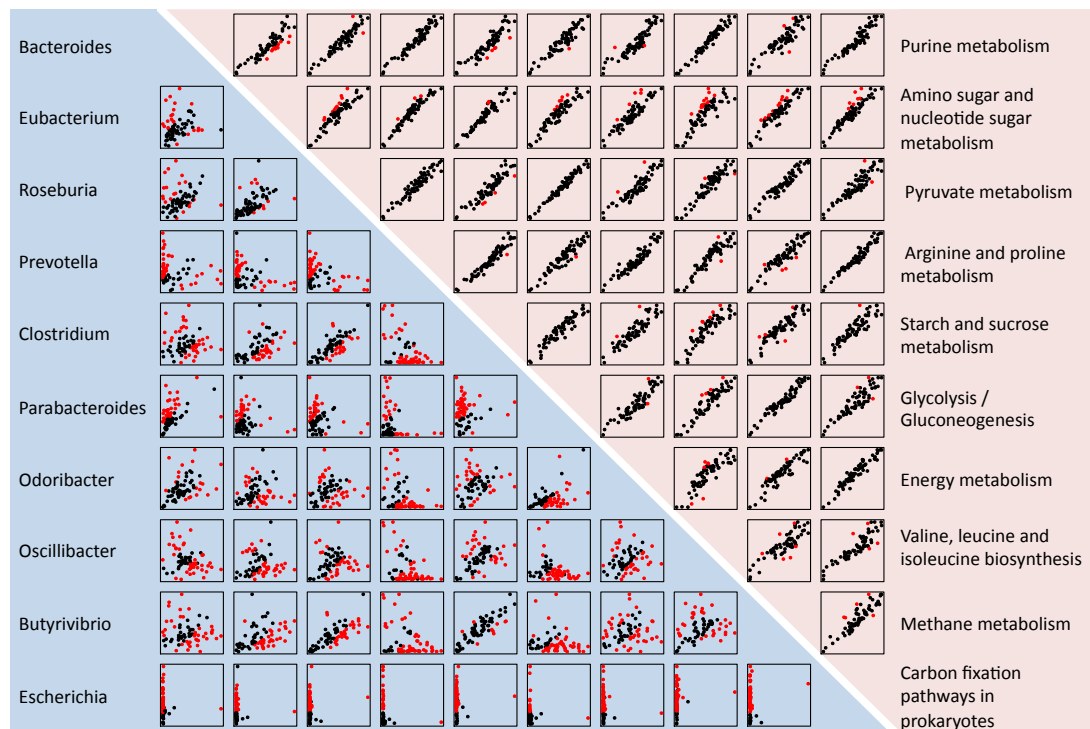

**Supplementary Figure S11.** Correlation analysis between pairs of function groups (upright panel) and pairs of genera (downleft panel) on 70 cohorts from gut of healthy human. Each dot denotes a sample, and black dots are samples with linear correlation between pairs of groups (with 5% divergence tolerance) and red dots are samples without proper linear correlation. Note that only top 10 most enriched genera/function groups are displayed.

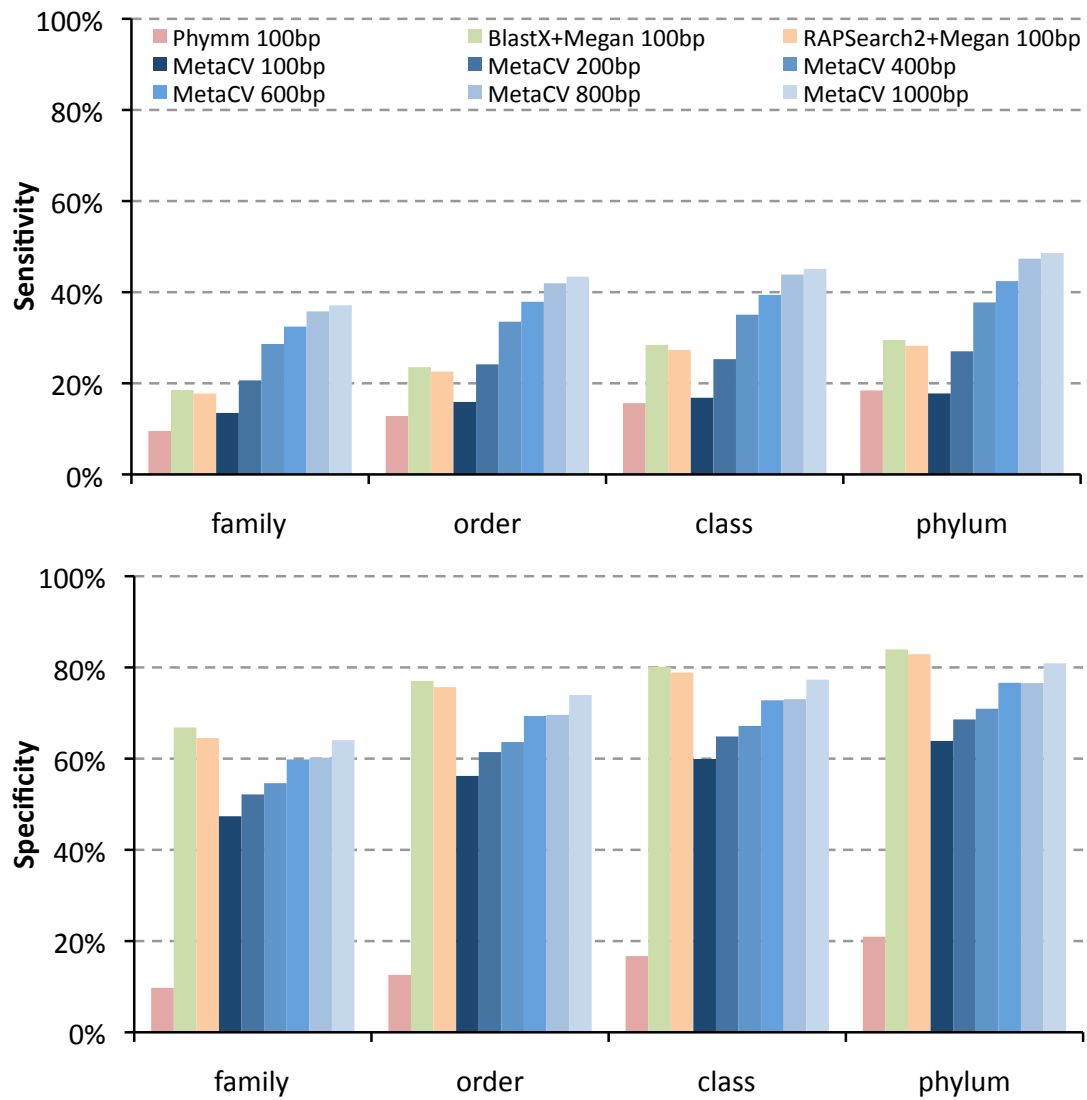

**Supplementary Figure S12.** Sensitivity and specificity comparisons of MetaCV, Phymm, BlastX and RAPSearch2 on a genus-mask testing. Ratio values of MetaCV, Phymm, BlastX and RAPSearch2 are colored by blue, red, green and orange, respectively. Four groups from left to right are the results of these methods on different taxonomic level (family to phylum, respectively). Only MetaCV is applied to classify simulated reads longer than 100 bp.

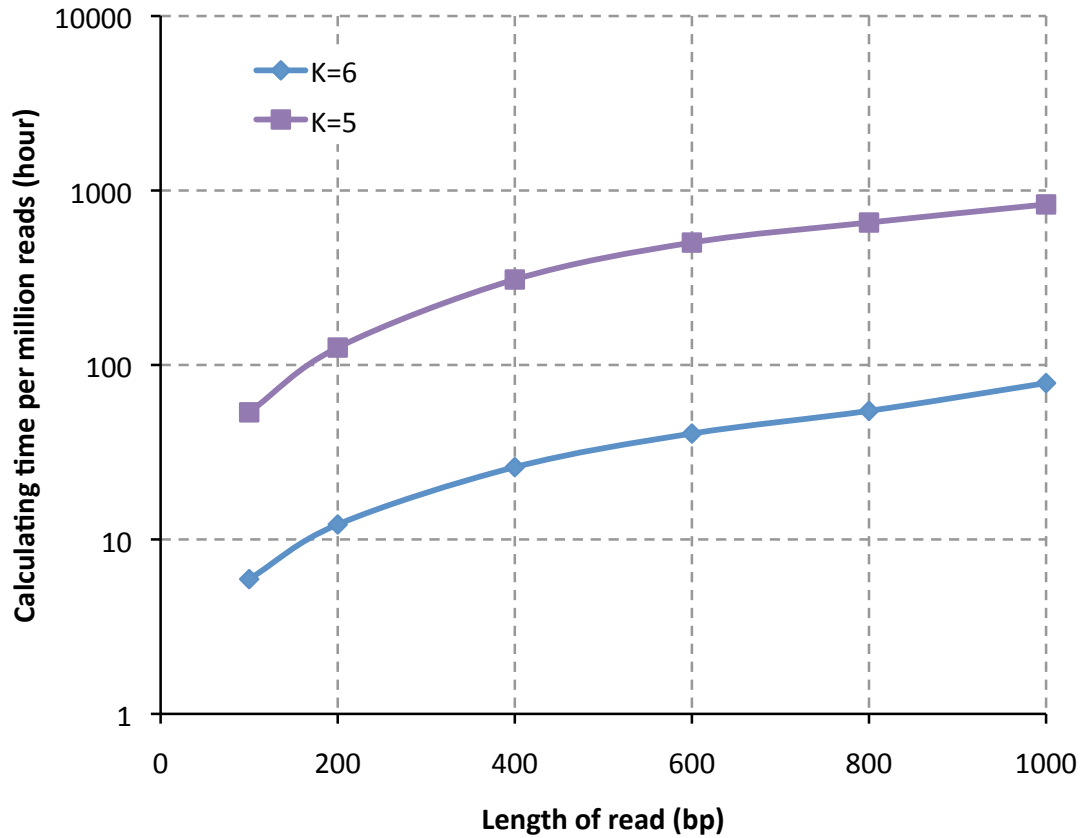

**Supplementary Figure S13.** Time consumed by MetaCV on the classification of short reads by using different oligopeptide lengths, of which K=6 was colored by blue and K=5 by purple. K values longer than 6 are not considered in this analysis because the dimensions of compositions are too high to make databases with affordable size.

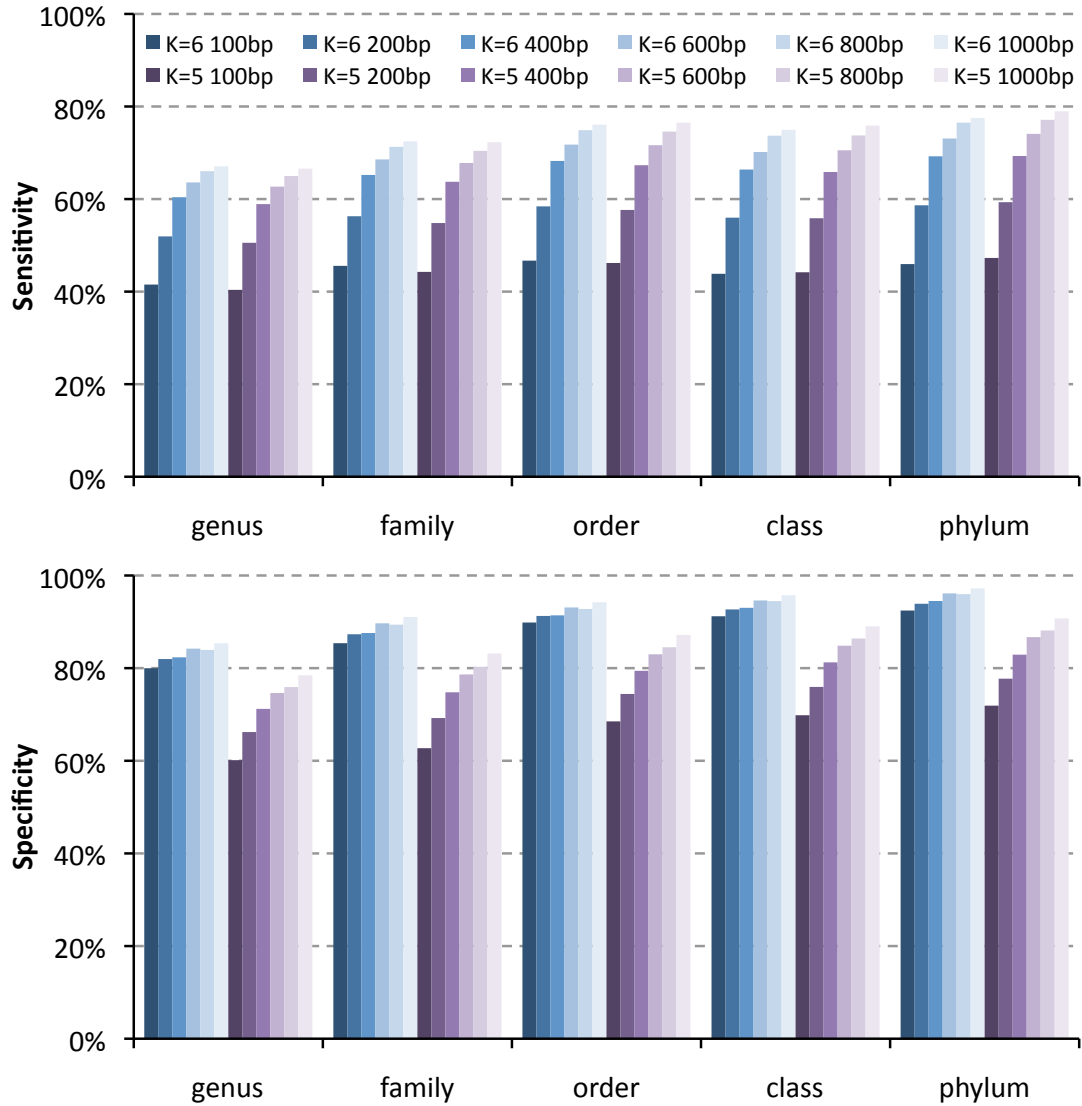

**Supplementary Figure S14.** Sensitivity and specificity comparisons of MetaCV by using different oligopeptide lengths on the species-mask testing (the Dataset 1), where K=6 was colored by blue and K=5 by purple. Five groups from left to right are the results on different taxonomic levels (from genus to phylum, respectively).

**Supplementary Table S1.** Performace comparison of MetaCV, Phymm, BlastX and RAPSearch2 on the classification of 100bp simulated reads from 154 genera. For each genus, a genome from one species is used to simulate reads while the organisms from other species are for reference profiles.

| Genus                       | MetaCV      |             | Phymm       |             | BlastX+Megan |              | RAPSearch2+Megan |             |
|-----------------------------|-------------|-------------|-------------|-------------|--------------|--------------|------------------|-------------|
|                             | Sensitivity | Specificity | Sensitivity | Specificity | Sensitivity  | Specificity  | Specificity      | Specificity |
| <i>Treponema</i>            | 92.7 ± 0.5% | 80.4 ± 0.7% | 81.3 ± 1.4% | 36.8 ± 0.6% | 90.0 ± 1.1%  | 78.5 ± 1.0%  | 89.1 ± 0.9%      | 78.2 ± 1.1% |
| <i>Rickettsia</i>           | 89.5 ± 0.6% | 98.2 ± 0.2% | 87.3 ± 1.1% | 27.1 ± 0.6% | 88.2 ± 0.8%  | 99.1 ± 0.2%  | 88.9 ± 0.6%      | 99.1 ± 0.2% |
| <i>Mycobacterium</i>        | 91.7 ± 0.4% | 71.5 ± 1.1% | 71.7 ± 0.5% | 18.0 ± 0.4% | 84.7 ± 0.8%  | 85.6 ± 0.9%  | 79.0 ± 1.3%      | 85.6 ± 0.3% |
| <i>Ureaplasma</i>           | 70.7 ± 1.4% | 99.6 ± 0.1% | 36.0 ± 0.9% | 71.5 ± 2.3% | 83.7 ± 1.2%  | 100.0 ± 0.0% | 80.7 ± 0.9%      | 99.9 ± 0.1% |
| <i>Borrelia</i>             | 79.7 ± 0.9% | 98.8 ± 0.3% | 54.0 ± 0.8% | 30.0 ± 0.6% | 82.4 ± 0.9%  | 99.9 ± 0.2%  | 80.3 ± 0.9%      | 99.9 ± 0.2% |
| <i>Francisella</i>          | 84.5 ± 0.2% | 97.7 ± 0.7% | 55.4 ± 0.3% | 52.6 ± 1.5% | 81.4 ± 1.0%  | 99.2 ± 0.3%  | 80.0 ± 1.1%      | 98.9 ± 0.5% |
| <i>Bacillus</i>             | 85.5 ± 0.5% | 76.7 ± 1.0% | 68.9 ± 1.9% | 13.2 ± 0.4% | 79.2 ± 1.0%  | 84.2 ± 1.5%  | 78.1 ± 0.9%      | 83.1 ± 1.2% |
| <i>Caldicellulosiruptor</i> | 82.2 ± 1.1% | 93.7 ± 0.7% | 63.3 ± 0.4% | 33.6 ± 0.6% | 78.7 ± 1.2%  | 95.4 ± 0.3%  | 77.8 ± 1.0%      | 95.4 ± 0.7% |
| <i>Neorickettsia</i>        | 74.7 ± 1.2% | 99.0 ± 0.4% | 26.0 ± 2.1% | 62.0 ± 2.3% | 78.2 ± 1.6%  | 99.9 ± 0.1%  | 77.0 ± 1.2%      | 99.9 ± 0.1% |
| <i>Brachyspira</i>          | 76.5 ± 1.5% | 95.8 ± 0.5% | 52.7 ± 1.7% | 48.4 ± 1.4% | 77.5 ± 0.7%  | 98.6 ± 0.6%  | 75.7 ± 0.9%      | 98.2 ± 0.7% |
| <i>Burkholderia</i>         | 83.7 ± 0.6% | 56.2 ± 0.7% | 83.0 ± 1.2% | 24.0 ± 0.4% | 77.4 ± 0.6%  | 68.2 ± 0.8%  | 72.9 ± 1.1%      | 66.2 ± 0.8% |
| <i>Acidiphilium</i>         | 80.9 ± 1.2% | 94.3 ± 0.7% | 42.7 ± 1.8% | 60.8 ± 0.8% | 75.2 ± 1.4%  | 96.6 ± 0.5%  | 71.4 ± 1.3%      | 96.3 ± 0.5% |
| <i>Thermoanaerobacter</i>   | 87.9 ± 1.0% | 91.6 ± 0.7% | 77.5 ± 0.9% | 44.5 ± 0.9% | 75.1 ± 1.1%  | 90.7 ± 0.5%  | 73.9 ± 0.9%      | 90.4 ± 0.4% |
| <i>Listeria</i>             | 79.0 ± 0.5% | 96.2 ± 0.4% | 26.1 ± 1.5% | 29.2 ± 0.8% | 74.9 ± 0.9%  | 96.6 ± 0.6%  | 74.1 ± 1.2%      | 96.4 ± 0.7% |
| <i>Brucella</i>             | 89.5 ± 1.1% | 96.4 ± 1.2% | 91.2 ± 0.7% | 44.6 ± 0.3% | 74.6 ± 1.4%  | 97.7 ± 0.2%  | 73.2 ± 1.3%      | 97.6 ± 0.6% |
| <i>Myxococcus</i>           | 69.2 ± 2.1% | 91.3 ± 1.1% | 47.2 ± 0.2% | 66.2 ± 1.5% | 74.4 ± 2.1%  | 97.9 ± 0.6%  | 70.8 ± 2.1%      | 97.9 ± 0.4% |
| <i>Bordetella</i>           | 83.3 ± 0.9% | 90.6 ± 0.9% | 58.5 ± 1.4% | 35.4 ± 0.9% | 74.3 ± 1.1%  | 95.6 ± 1.0%  | 71.1 ± 0.6%      | 95.0 ± 1.1% |
| <i>Streptococcus</i>        | 75.2 ± 1.2% | 79.5 ± 1.3% | 55.2 ± 0.2% | 9.7 ± 0.1%  | 74.2 ± 1.0%  | 84.4 ± 1.1%  | 74.0 ± 1.2%      | 83.6 ± 1.0% |
| <i>Dictyoglomus</i>         | 62.8 ± 1.4% | 97.4 ± 0.5% | 17.8 ± 1.5% | 45.7 ± 2.7% | 73.9 ± 0.4%  | 98.7 ± 0.4%  | 72.3 ± 0.7%      | 98.6 ± 0.5% |
| <i>Haloarcula</i>           | 70.3 ± 0.9% | 98.2 ± 0.7% | 42.3 ± 1.0% | 65.8 ± 2.2% | 73.9 ± 1.0%  | 99.6 ± 0.2%  | 71.2 ± 1.1%      | 99.5 ± 0.3% |
| <i>Helicobacter</i>         | 69.0 ± 1.3% | 90.4 ± 1.4% | 71.7 ± 1.7% | 49.4 ± 1.1% | 73.1 ± 0.6%  | 96.3 ± 0.5%  | 71.6 ± 0.8%      | 95.7 ± 0.6% |
| <i>Methanothermobacter</i>  | 60.6 ± 1.4% | 95.8 ± 0.8% | 53.0 ± 0.6% | 67.6 ± 1.4% | 72.7 ± 1.2%  | 97.0 ± 0.6%  | 70.6 ± 1.6%      | 96.5 ± 0.5% |
| <i>Neisseria</i>            | 78.8 ± 1.5% | 96.2 ± 0.5% | 76.2 ± 1.7% | 65.4 ± 0.6% | 72.5 ± 0.9%  | 96.5 ± 0.6%  | 72.2 ± 0.9%      | 96.7 ± 0.6% |
| <i>Sulfolobus</i>           | 68.6 ± 1.6% | 89.6 ± 0.9% | 29.2 ± 1.2% | 31.5 ± 1.4% | 72.0 ± 1.9%  | 92.4 ± 0.6%  | 70.7 ± 2.3%      | 91.8 ± 0.6% |
| <i>Geobacillus</i>          | 81.5 ± 0.5% | 94.6 ± 1.0% | 77.3 ± 1.5% | 42.9 ± 0.4% | 71.8 ± 1.1%  | 96.9 ± 0.9%  | 70.8 ± 1.4%      | 96.7 ± 0.9% |
| <i>Geobacter</i>            | 72.2 ± 1.3% | 76.3 ± 1.2% | 37.8 ± 1.3% | 18.3 ± 0.8% | 71.7 ± 1.3%  | 82.8 ± 1.4%  | 69.8 ± 1.3%      | 81.7 ± 1.1% |
| <i>Methanocaldococcus</i>   | 71.5 ± 1.2% | 95.3 ± 1.1% | 45.1 ± 0.9% | 39.3 ± 0.8% | 70.7 ± 1.3%  | 97.0 ± 0.2%  | 69.2 ± 1.2%      | 96.6 ± 0.2% |
| <i>Staphylothermus</i>      | 65.7 ± 1.8% | 97.0 ± 0.1% | 46.9 ± 1.5% | 62.7 ± 1.9% | 70.0 ± 2.2%  | 98.8 ± 0.4%  | 68.7 ± 1.8%      | 98.6 ± 0.4% |



|                          |             |             |             |             |             |              |             |              |
|--------------------------|-------------|-------------|-------------|-------------|-------------|--------------|-------------|--------------|
| <i>Roseobacter</i>       | 71.5 ± 1.4% | 90.5 ± 1.5% | 22.7 ± 0.8% | 46.8 ± 1.7% | 69.3 ± 1.5% | 93.6 ± 0.9%  | 68.0 ± 1.7% | 93.4 ± 0.7%  |
| <i>Anaplasma</i>         | 63.2 ± 1.3% | 97.5 ± 0.6% | 36.3 ± 1.5% | 43.7 ± 1.5% | 68.9 ± 1.1% | 99.9 ± 0.1%  | 67.1 ± 1.4% | 99.9 ± 0.1%  |
| <i>Chloroflexus</i>      | 52.5 ± 1.5% | 93.5 ± 0.7% | 15.8 ± 1.1% | 32.0 ± 1.2% | 68.6 ± 2.0% | 97.7 ± 0.7%  | 64.5 ± 1.4% | 97.2 ± 0.8%  |
| <i>Candidatus</i>        | 61.6 ± 1.2% | 99.0 ± 0.5% | 52.9 ± 0.3% | 40.4 ± 0.7% | 67.6 ± 1.8% | 100.0 ± 0.0% | 64.8 ± 2.0% | 100.0 ± 0.1% |
| <i>Bifidobacterium</i>   | 60.4 ± 0.4% | 93.2 ± 0.5% | 26.6 ± 0.6% | 14.9 ± 0.4% | 66.6 ± 0.3% | 97.7 ± 0.6%  | 64.4 ± 0.7% | 97.3 ± 0.4%  |
| <i>Lactobacillus</i>     | 57.7 ± 1.4% | 63.0 ± 1.7% | 27.5 ± 1.3% | 6.7 ± 0.4%  | 64.3 ± 1.7% | 72.6 ± 0.9%  | 62.4 ± 1.4% | 71.0 ± 1.1%  |
| <i>Shewanella</i>        | 65.4 ± 1.3% | 69.6 ± 2.2% | 43.1 ± 1.6% | 13.3 ± 0.4% | 63.8 ± 1.2% | 83.2 ± 1.3%  | 62.9 ± 1.0% | 81.5 ± 1.7%  |
| <i>Aeromonas</i>         | 68.9 ± 0.6% | 92.2 ± 1.0% | 28.0 ± 0.7% | 36.8 ± 0.7% | 62.4 ± 0.8% | 96.9 ± 0.8%  | 60.4 ± 1.1% | 96.5 ± 0.3%  |
| <i>Wolbachia</i>         | 51.0 ± 1.1% | 97.7 ± 0.5% | 12.2 ± 0.4% | 21.8 ± 1.8% | 62.3 ± 0.8% | 99.6 ± 0.2%  | 60.6 ± 1.1% | 99.6 ± 0.2%  |
| <i>Vulcanisaeta</i>      | 49.2 ± 1.4% | 97.5 ± 0.6% | 53.9 ± 1.2% | 71.2 ± 1.2% | 62.3 ± 1.9% | 98.2 ± 0.4%  | 60.4 ± 2.1% | 98.1 ± 0.7%  |
| <i>Methylobacterium</i>  | 65.6 ± 1.4% | 75.8 ± 1.1% | 41.8 ± 1.3% | 26.0 ± 0.7% | 62.0 ± 1.4% | 86.9 ± 0.4%  | 59.0 ± 1.7% | 86.2 ± 0.5%  |
| <i>Psychrobacter</i>     | 64.6 ± 1.0% | 95.4 ± 0.5% | 29.7 ± 1.3% | 45.5 ± 2.1% | 61.7 ± 0.8% | 98.0 ± 0.3%  | 60.6 ± 0.6% | 97.8 ± 0.4%  |
| <i>Caulobacter</i>       | 55.5 ± 0.4% | 88.4 ± 1.8% | 30.6 ± 0.6% | 37.5 ± 1.1% | 61.7 ± 1.2% | 94.0 ± 0.9%  | 58.4 ± 1.4% | 93.9 ± 0.8%  |
| <i>Acidovorax</i>        | 65.6 ± 1.3% | 90.0 ± 1.2% | 29.1 ± 1.0% | 28.7 ± 1.2% | 61.0 ± 1.2% | 95.2 ± 0.5%  | 58.0 ± 0.6% | 95.6 ± 0.9%  |
| <i>Taylorella</i>        | 53.8 ± 1.1% | 98.5 ± 0.4% | 8.9 ± 1.5%  | 32.7 ± 4.1% | 59.2 ± 0.7% | 99.7 ± 0.2%  | 58.0 ± 0.9% | 99.6 ± 0.3%  |
| <i>Xanthomonas</i>       | 61.9 ± 0.8% | 71.2 ± 1.5% | 33.7 ± 1.0% | 24.8 ± 0.6% | 58.7 ± 1.4% | 76.2 ± 0.6%  | 55.5 ± 1.7% | 75.8 ± 1.1%  |
| <i>Mesorhizobium</i>     | 64.9 ± 1.0% | 85.2 ± 0.9% | 19.3 ± 1.9% | 27.1 ± 2.4% | 58.7 ± 0.4% | 88.5 ± 1.4%  | 56.7 ± 0.6% | 88.0 ± 0.9%  |
| <i>Pseudomonas</i>       | 58.9 ± 1.4% | 64.0 ± 1.7% | 43.2 ± 2.4% | 10.7 ± 0.5% | 58.4 ± 1.8% | 80.2 ± 1.2%  | 56.6 ± 1.8% | 77.6 ± 0.6%  |
| <i>Streptomyces</i>      | 50.6 ± 1.9% | 53.6 ± 1.1% | 45.0 ± 1.8% | 22.1 ± 0.6% | 57.1 ± 2.1% | 77.2 ± 1.1%  | 54.5 ± 2.4% | 77.5 ± 3.3%  |
| <i>Acidithiobacillus</i> | 50.6 ± 0.8% | 91.7 ± 0.8% | 8.3 ± 0.6%  | 16.5 ± 1.0% | 57.1 ± 1.8% | 96.6 ± 0.5%  | 55.1 ± 2.1% | 96.2 ± 0.8%  |
| <i>Pyrobaculum</i>       | 50.4 ± 1.5% | 45.0 ± 1.1% | 54.8 ± 0.8% | 35.2 ± 0.6% | 56.6 ± 0.6% | 49.1 ± 0.7%  | 59.7 ± 1.7% | 49.7 ± 1.3%  |
| <i>Staphylococcus</i>    | 46.3 ± 1.3% | 89.4 ± 0.9% | 20.6 ± 1.9% | 14.7 ± 1.1% | 55.5 ± 2.0% | 97.3 ± 0.7%  | 54.6 ± 2.1% | 96.8 ± 0.7%  |
| <i>Thermus</i>           | 48.7 ± 1.0% | 91.2 ± 1.3% | 73.5 ± 1.0% | 82.2 ± 1.0% | 55.2 ± 1.9% | 93.5 ± 0.9%  | 50.2 ± 1.8% | 92.7 ± 1.2%  |
| <i>Salinispora</i>       | 50.8 ± 1.1% | 92.7 ± 2.0% | 14.6 ± 1.4% | 46.6 ± 1.6% | 54.8 ± 1.4% | 98.0 ± 0.5%  | 50.0 ± 1.6% | 97.6 ± 0.6%  |
| <i>Serratia</i>          | 78.4 ± 2.1% | 90.4 ± 1.3% | 50.7 ± 1.7% | 37.9 ± 0.8% | 54.7 ± 1.5% | 94.5 ± 1.0%  | 54.0 ± 1.9% | 94.1 ± 0.5%  |
| <i>Thermoplasma</i>      | 32.1 ± 1.9% | 98.3 ± 0.2% | 3.4 ± 0.8%  | 13.1 ± 2.7% | 53.3 ± 1.0% | 99.2 ± 0.4%  | 52.0 ± 1.1% | 99.1 ± 0.4%  |
| <i>Sphingobium</i>       | 51.7 ± 1.5% | 89.7 ± 1.6% | 33.5 ± 1.1% | 36.2 ± 1.2% | 52.9 ± 1.9% | 94.7 ± 0.6%  | 51.2 ± 1.6% | 94.6 ± 0.7%  |
| <i>Corynebacterium</i>   | 39.7 ± 1.3% | 72.1 ± 1.5% | 28.7 ± 0.9% | 10.4 ± 0.5% | 52.8 ± 1.7% | 88.3 ± 1.0%  | 50.7 ± 1.9% | 87.1 ± 1.1%  |
| <i>Desulfurococcus</i>   | 32.3 ± 1.4% | 96.9 ± 1.0% | 23.9 ± 1.5% | 62.8 ± 2.2% | 52.5 ± 1.7% | 99.3 ± 0.5%  | 50.6 ± 1.0% | 99.4 ± 0.5%  |
| <i>Methanosarcina</i>    | 40.7 ± 0.6% | 88.5 ± 1.4% | 15.4 ± 0.5% | 25.0 ± 1.0% | 51.1 ± 1.2% | 89.2 ± 1.4%  | 49.5 ± 1.2% | 88.6 ± 0.7%  |
| <i>Prevotella</i>        | 44.6 ± 2.0% | 90.0 ± 1.7% | 3.4 ± 0.5%  | 6.7 ± 0.9%  | 50.5 ± 2.8% | 95.7 ± 1.2%  | 49.3 ± 3.1% | 94.7 ± 1.0%  |
| <i>Yersinia</i>          | 73.7 ± 2.0% | 86.7 ± 0.8% | 71.3 ± 1.7% | 40.4 ± 1.0% | 50.2 ± 1.3% | 88.0 ± 1.8%  | 49.3 ± 0.9% | 87.4 ± 1.0%  |
| <i>Metallosphaera</i>    | 35.8 ± 1.4% | 95.7 ± 1.0% | 10.9 ± 0.6% | 27.5 ± 0.6% | 50.1 ± 1.1% | 97.0 ± 1.0%  | 48.9 ± 1.3% | 97.2 ± 1.3%  |
| <i>Chlamydophila</i>     | 5.8 ± 0.5%  | 49.6 ± 4.9% | 7.2 ± 0.7%  | 17.3 ± 1.1% | 49.5 ± 1.5% | 63.1 ± 2.1%  | 1.8 ± 0.4%  | 38.8 ± 7.8%  |
| <i>Nitrosomonas</i>      | 44.2 ± 1.4% | 87.0 ± 0.9% | 7.1 ± 1.5%  | 11.0 ± 2.2% | 49.5 ± 1.0% | 92.7 ± 0.8%  | 48.2 ± 0.9% | 92.2 ± 0.9%  |

|                              |             |             |             |             |             |             |             |             |
|------------------------------|-------------|-------------|-------------|-------------|-------------|-------------|-------------|-------------|
| <i>Bartonella</i>            | 47.3 ± 0.9% | 94.2 ± 0.8% | 13.3 ± 1.0% | 13.9 ± 0.8% | 49.4 ± 1.9% | 99.1 ± 0.4% | 48.4 ± 1.4% | 99.1 ± 0.3% |
| <i>Candidatus</i>            | 33.8 ± 1.0% | 98.6 ± 0.7% | 4.4 ± 0.8%  | 20.3 ± 3.1% | 49.4 ± 2.6% | 99.9 ± 0.2% | 47.3 ± 2.7% | 99.8 ± 0.3% |
| <i>Deinococcus</i>           | 34.0 ± 1.6% | 81.8 ± 1.8% | 15.1 ± 1.0% | 15.1 ± 1.1% | 48.5 ± 1.2% | 93.8 ± 1.3% | 46.0 ± 1.3% | 92.6 ± 1.1% |
| <i>Bacteroides</i>           | 38.6 ± 1.3% | 68.9 ± 1.5% | 14.4 ± 0.8% | 14.7 ± 0.8% | 48.1 ± 1.3% | 74.6 ± 2.0% | 47.3 ± 1.3% | 73.1 ± 2.0% |
| <i>Methanococcus</i>         | 38.8 ± 1.7% | 93.1 ± 1.0% | 18.8 ± 0.6% | 21.3 ± 1.0% | 47.5 ± 2.5% | 97.2 ± 1.0% | 45.7 ± 2.0% | 97.6 ± 0.7% |
| <i>Fervidobacterium</i>      | 34.6 ± 1.3% | 84.8 ± 1.4% | 5.4 ± 0.4%  | 19.2 ± 1.9% | 46.9 ± 1.3% | 91.2 ± 0.6% | 46.1 ± 1.3% | 90.6 ± 1.1% |
| <i>Arcobacter</i>            | 48.4 ± 1.3% | 89.7 ± 2.0% | 34.1 ± 1.0% | 44.2 ± 1.7% | 46.2 ± 2.3% | 94.6 ± 1.3% | 60.8 ± 1.9% | 94.1 ± 0.9% |
| <i>Leuconostoc</i>           | 40.7 ± 0.9% | 94.5 ± 0.6% | 14.0 ± 0.9% | 15.7 ± 0.9% | 45.6 ± 1.9% | 97.6 ± 0.9% | 48.1 ± 1.4% | 97.1 ± 0.4% |
| <i>Campylobacter</i>         | 29.7 ± 2.0% | 85.7 ± 2.1% | 30.6 ± 0.6% | 29.0 ± 0.7% | 45.1 ± 1.0% | 95.8 ± 1.2% | 43.3 ± 0.8% | 95.5 ± 0.8% |
| <i>Thermosiphon</i>          | 31.5 ± 0.7% | 89.1 ± 1.2% | 6.6 ± 0.2%  | 23.6 ± 1.1% | 43.7 ± 0.8% | 95.7 ± 1.0% | 42.0 ± 1.1% | 95.5 ± 1.2% |
| <i>Cupriavidus</i>           | 49.3 ± 1.3% | 78.6 ± 1.1% | 16.3 ± 0.8% | 21.0 ± 0.4% | 42.8 ± 1.8% | 89.6 ± 0.8% | 40.1 ± 1.6% | 89.0 ± 1.0% |
| <i>Edwardsiella</i>          | 59.1 ± 0.9% | 93.7 ± 0.9% | 24.0 ± 1.3% | 49.3 ± 1.9% | 42.3 ± 0.7% | 97.7 ± 0.8% | 41.4 ± 0.8% | 97.1 ± 0.7% |
| <i>Pyrococcus</i>            | 52.9 ± 0.4% | 78.4 ± 1.3% | 37.5 ± 1.0% | 26.7 ± 0.8% | 42.1 ± 1.6% | 87.2 ± 1.2% | 41.9 ± 1.1% | 85.2 ± 1.2% |
| <i>Thermoanaerobacterium</i> | 46.0 ± 1.5% | 97.0 ± 0.6% | 7.0 ± 0.3%  | 27.4 ± 1.3% | 41.5 ± 1.6% | 98.5 ± 0.6% | 40.9 ± 1.6% | 98.1 ± 0.4% |
| <i>Vibrio</i>                | 44.3 ± 1.0% | 66.5 ± 1.0% | 21.7 ± 1.3% | 11.4 ± 0.6% | 41.0 ± 0.7% | 78.2 ± 0.5% | 41.0 ± 0.6% | 76.4 ± 1.5% |
| <i>Erwinia</i>               | 57.8 ± 0.7% | 82.7 ± 1.2% | 20.4 ± 0.4% | 23.3 ± 0.9% | 40.1 ± 1.7% | 90.4 ± 2.2% | 38.5 ± 1.3% | 89.9 ± 1.7% |
| <i>Pectobacterium</i>        | 60.1 ± 1.6% | 87.5 ± 1.4% | 18.6 ± 1.1% | 29.7 ± 1.8% | 39.7 ± 1.3% | 92.2 ± 1.6% | 39.1 ± 1.8% | 91.3 ± 1.3% |
| <i>Legionella</i>            | 23.0 ± 1.2% | 90.0 ± 0.8% | 1.9 ± 0.3%  | 11.5 ± 2.0% | 38.9 ± 1.9% | 97.4 ± 1.0% | 37.0 ± 2.3% | 96.9 ± 1.1% |
| <i>Rhizobium</i>             | 49.0 ± 1.6% | 66.7 ± 1.8% | 17.1 ± 1.9% | 23.6 ± 2.6% | 38.5 ± 1.9% | 70.4 ± 1.5% | 37.5 ± 1.7% | 70.4 ± 1.5% |
| <i>Desulfovibrio</i>         | 21.5 ± 0.4% | 56.7 ± 1.4% | 8.5 ± 0.5%  | 4.8 ± 0.4%  | 36.9 ± 1.8% | 86.2 ± 0.9% | 35.4 ± 2.0% | 84.6 ± 1.5% |
| <i>Rothia</i>                | 29.0 ± 2.7% | 91.9 ± 1.4% | 7.6 ± 1.2%  | 24.4 ± 3.1% | 36.6 ± 3.4% | 98.0 ± 0.4% | 35.1 ± 3.3% | 97.7 ± 0.6% |
| <i>Ehrlichia</i>             | 25.7 ± 0.8% | 96.5 ± 0.4% | 17.2 ± 0.6% | 32.8 ± 0.5% | 36.0 ± 1.1% | 99.7 ± 0.2% | 34.6 ± 0.6% | 99.7 ± 0.3% |
| <i>Chlorobaculum</i>         | 37.8 ± 0.7% | 85.2 ± 2.4% | 12.1 ± 1.0% | 34.3 ± 2.9% | 35.7 ± 0.8% | 93.1 ± 0.8% | 34.6 ± 1.0% | 91.9 ± 1.6% |
| <i>Acidaminococcus</i>       | 23.6 ± 1.3% | 91.0 ± 1.3% | 2.7 ± 0.4%  | 10.2 ± 1.8% | 35.3 ± 2.0% | 97.0 ± 0.3% | 33.9 ± 1.8% | 96.8 ± 1.0% |
| <i>Thermotoga</i>            | 19.7 ± 2.1% | 74.4 ± 2.2% | 9.0 ± 0.7%  | 8.0 ± 0.7%  | 34.4 ± 1.8% | 88.0 ± 1.0% | 33.5 ± 1.4% | 86.9 ± 1.9% |
| <i>Nitrobacter</i>           | 33.0 ± 1.8% | 92.9 ± 2.1% | 5.5 ± 0.9%  | 21.4 ± 3.0% | 34.4 ± 1.6% | 97.2 ± 0.9% | 33.5 ± 1.7% | 97.1 ± 0.9% |
| <i>Methanocella</i>          | 33.1 ± 1.4% | 88.9 ± 1.4% | 13.9 ± 0.9% | 25.1 ± 1.1% | 34.3 ± 0.6% | 94.3 ± 1.2% | 49.3 ± 1.9% | 95.2 ± 1.2% |
| <i>Mycoplasma</i>            | 13.6 ± 0.6% | 71.1 ± 1.8% | 33.1 ± 1.6% | 6.8 ± 0.4%  | 33.8 ± 1.7% | 96.9 ± 1.0% | 32.2 ± 1.8% | 96.2 ± 0.7% |
| <i>Sulfurimonas</i>          | 20.9 ± 1.1% | 91.2 ± 2.3% | 4.3 ± 1.2%  | 18.9 ± 5.5% | 32.9 ± 1.1% | 97.5 ± 0.6% | 31.8 ± 1.0% | 97.5 ± 0.3% |
| <i>Dickeya</i>               | 49.9 ± 1.4% | 92.8 ± 1.6% | 10.1 ± 1.2% | 28.4 ± 3.4% | 32.2 ± 0.7% | 95.4 ± 0.8% | 31.0 ± 0.4% | 95.0 ± 1.1% |
| <i>Methylotenera</i>         | 28.3 ± 0.9% | 93.8 ± 0.7% | 6.2 ± 0.9%  | 23.7 ± 3.1% | 32.1 ± 0.8% | 98.4 ± 0.5% | 31.2 ± 1.3% | 97.7 ± 0.6% |
| <i>Cronobacter</i>           | 54.8 ± 1.4% | 89.6 ± 1.2% | 30.2 ± 2.2% | 47.6 ± 2.8% | 32.0 ± 1.6% | 91.4 ± 2.5% | 31.4 ± 1.3% | 90.7 ± 1.5% |
| <i>Clostridium</i>           | 20.4 ± 1.3% | 30.2 ± 1.6% | 34.6 ± 1.3% | 9.2 ± 0.3%  | 31.3 ± 1.2% | 49.6 ± 2.0% | 31.0 ± 1.0% | 46.6 ± 1.7% |
| <i>Flavobacterium</i>        | 23.8 ± 0.7% | 58.0 ± 1.6% | 11.0 ± 0.7% | 10.9 ± 0.7% | 31.1 ± 1.5% | 72.3 ± 2.3% | 30.3 ± 1.0% | 70.2 ± 1.5% |
| <i>Aliivibrio</i>            | 36.1 ± 1.4% | 93.2 ± 1.2% | 4.3 ± 0.7%  | 18.6 ± 2.2% | 29.9 ± 2.0% | 98.5 ± 0.7% | 29.2 ± 1.8% | 97.9 ± 1.4% |

|                           |             |             |             |             |             |              |             |             |
|---------------------------|-------------|-------------|-------------|-------------|-------------|--------------|-------------|-------------|
| <i>Xenorhabdus</i>        | 36.1 ± 1.2% | 91.1 ± 1.2% | 7.2 ± 1.0%  | 26.4 ± 4.1% | 29.9 ± 1.1% | 95.5 ± 1.1%  | 29.2 ± 1.2% | 94.5 ± 0.6% |
| <i>Sinorhizobium</i>      | 35.2 ± 1.8% | 74.5 ± 1.2% | 11.8 ± 0.9% | 13.6 ± 0.7% | 29.9 ± 1.1% | 81.4 ± 1.3%  | 28.2 ± 1.4% | 80.1 ± 2.1% |
| <i>Meiothermus</i>        | 20.4 ± 2.3% | 82.8 ± 2.9% | 20.8 ± 1.0% | 52.8 ± 1.0% | 29.2 ± 0.6% | 91.2 ± 1.7%  | 27.4 ± 1.1% | 90.1 ± 1.3% |
| <i>Archaeoglobus</i>      | 15.9 ± 0.6% | 86.8 ± 2.0% | 17.1 ± 1.8% | 23.8 ± 2.5% | 29.2 ± 1.2% | 93.9 ± 1.8%  | 27.6 ± 1.0% | 93.8 ± 1.3% |
| <i>Ralstonia</i>          | 32.9 ± 0.7% | 91.2 ± 1.4% | 4.3 ± 1.0%  | 11.4 ± 2.2% | 29.1 ± 1.1% | 96.1 ± 1.6%  | 27.5 ± 0.7% | 95.7 ± 1.0% |
| <i>Acinetobacter</i>      | 71.8 ± 0.4% | 94.6 ± 1.0% | 21.3 ± 1.2% | 27.8 ± 0.9% | 29.0 ± 1.1% | 95.6 ± 1.9%  | 67.9 ± 0.9% | 97.4 ± 0.8% |
| <i>Aggregatibacter</i>    | 40.4 ± 1.8% | 81.8 ± 1.0% | 14.1 ± 1.1% | 36.8 ± 2.7% | 28.6 ± 2.0% | 89.1 ± 2.0%  | 27.8 ± 2.1% | 89.6 ± 1.4% |
| <i>Sphaerochaeta</i>      | 17.9 ± 1.3% | 87.6 ± 2.2% | 7.5 ± 0.1%  | 21.4 ± 0.9% | 27.9 ± 1.4% | 96.1 ± 1.2%  | 26.9 ± 0.9% | 95.8 ± 0.9% |
| <i>Gordonia</i>           | 24.0 ± 1.6% | 85.3 ± 2.0% | 7.0 ± 1.5%  | 29.0 ± 5.7% | 27.4 ± 0.8% | 97.0 ± 0.7%  | 25.5 ± 1.3% | 96.2 ± 0.9% |
| <i>Rhodococcus</i>        | 25.4 ± 1.4% | 56.8 ± 2.0% | 13.2 ± 1.6% | 18.7 ± 2.1% | 25.9 ± 0.7% | 77.0 ± 0.8%  | 23.8 ± 1.0% | 74.6 ± 1.2% |
| <i>Klebsiella</i>         | 50.6 ± 1.3% | 81.2 ± 1.4% | 43.0 ± 1.9% | 41.8 ± 1.2% | 24.9 ± 1.3% | 85.1 ± 2.2%  | 24.3 ± 1.3% | 84.2 ± 1.3% |
| <i>Nocardia</i>           | 24.7 ± 1.8% | 78.5 ± 3.4% | 8.1 ± 1.1%  | 28.2 ± 2.8% | 24.6 ± 2.2% | 92.4 ± 1.6%  | 22.4 ± 1.4% | 90.7 ± 1.3% |
| <i>Cellulophaga</i>       | 18.2 ± 2.0% | 78.8 ± 3.8% | 5.8 ± 0.8%  | 21.2 ± 1.4% | 24.1 ± 1.8% | 87.8 ± 1.9%  | 23.0 ± 1.8% | 87.1 ± 1.2% |
| <i>Gluconacetobacter</i>  | 18.1 ± 1.3% | 87.4 ± 2.8% | 2.2 ± 0.3%  | 7.0 ± 0.9%  | 23.9 ± 1.5% | 96.0 ± 0.6%  | 22.7 ± 1.5% | 96.0 ± 0.8% |
| <i>Rhodospirillum</i>     | 14.8 ± 1.1% | 68.7 ± 4.6% | 7.8 ± 0.8%  | 10.6 ± 1.1% | 22.1 ± 1.1% | 90.9 ± 0.4%  | 20.2 ± 1.5% | 88.6 ± 1.6% |
| <i>Selenomonas</i>        | 13.0 ± 1.4% | 81.1 ± 3.1% | 0.6 ± 0.3%  | 2.1 ± 1.0%  | 21.3 ± 1.8% | 92.9 ± 1.1%  | 20.0 ± 1.8% | 92.3 ± 1.5% |
| <i>Lactococcus</i>        | 18.1 ± 1.3% | 93.4 ± 3.6% | 1.8 ± 0.4%  | 11.2 ± 2.1% | 21.3 ± 1.3% | 96.8 ± 0.6%  | 20.0 ± 1.8% | 96.7 ± 0.5% |
| <i>Thermococcus</i>       | 27.6 ± 1.0% | 75.5 ± 2.5% | 8.2 ± 0.6%  | 5.8 ± 0.3%  | 21.2 ± 1.1% | 80.6 ± 2.1%  | 23.3 ± 1.1% | 79.7 ± 1.4% |
| <i>Shigella</i>           | 41.0 ± 2.0% | 52.2 ± 1.1% | 54.4 ± 2.5% | 26.1 ± 1.4% | 21.1 ± 0.7% | 55.5 ± 3.0%  | 21.6 ± 0.8% | 55.9 ± 3.0% |
| <i>Leptospira</i>         | 8.2 ± 0.9%  | 81.0 ± 4.5% | 11.5 ± 1.1% | 16.6 ± 1.7% | 20.4 ± 0.7% | 93.5 ± 1.2%  | 19.7 ± 0.7% | 93.6 ± 2.2% |
| <i>Candidatus</i>         | 19.4 ± 1.1% | 96.3 ± 1.9% | 13.4 ± 0.5% | 22.1 ± 1.2% | 19.6 ± 1.0% | 100.0 ± 0.0% | 19.4 ± 0.7% | 99.9 ± 0.2% |
| <i>Pedobacter</i>         | 9.9 ± 0.5%  | 71.5 ± 1.7% | 2.0 ± 0.3%  | 10.8 ± 1.1% | 19.2 ± 1.1% | 91.7 ± 1.4%  | 18.1 ± 1.0% | 89.4 ± 0.9% |
| <i>Haemophilus</i>        | 30.3 ± 0.9% | 40.9 ± 1.2% | 21.4 ± 1.8% | 21.6 ± 1.9% | 19.2 ± 0.9% | 35.8 ± 0.8%  | 19.0 ± 0.8% | 36.0 ± 0.4% |
| <i>Methanosaeta</i>       | 8.9 ± 1.0%  | 86.6 ± 2.7% | 5.3 ± 0.9%  | 16.8 ± 2.5% | 18.4 ± 1.4% | 97.1 ± 1.5%  | 17.2 ± 1.4% | 96.4 ± 1.3% |
| <i>Pantoea</i>            | 32.5 ± 0.6% | 81.1 ± 1.2% | 8.2 ± 0.4%  | 12.4 ± 0.9% | 18.1 ± 1.5% | 85.9 ± 2.6%  | 17.8 ± 1.4% | 84.4 ± 3.1% |
| <i>Desulfotomaculum</i>   | 10.2 ± 0.5% | 54.5 ± 2.4% | 7.9 ± 1.1%  | 8.4 ± 1.2%  | 16.5 ± 0.7% | 81.1 ± 3.3%  | 15.7 ± 0.8% | 79.6 ± 2.2% |
| <i>Capnocytophaga</i>     | 12.2 ± 0.9% | 82.3 ± 3.2% | 4.5 ± 0.8%  | 17.9 ± 2.7% | 16.0 ± 1.0% | 91.0 ± 1.8%  | 14.8 ± 1.0% | 90.4 ± 2.3% |
| <i>Pediococcus</i>        | 15.3 ± 1.0% | 93.1 ± 0.6% | 1.4 ± 0.2%  | 10.2 ± 2.4% | 15.4 ± 1.1% | 97.7 ± 1.2%  | 15.3 ± 1.1% | 97.4 ± 1.0% |
| <i>Paenibacillus</i>      | 12.0 ± 1.0% | 54.6 ± 2.8% | 5.7 ± 0.3%  | 6.1 ± 0.3%  | 15.1 ± 1.1% | 80.2 ± 1.6%  | 16.6 ± 1.3% | 77.5 ± 2.1% |
| <i>Enterobacter</i>       | 33.7 ± 1.0% | 65.4 ± 1.4% | 12.0 ± 0.9% | 12.8 ± 1.0% | 14.9 ± 1.1% | 70.2 ± 1.5%  | 14.5 ± 1.0% | 69.0 ± 1.7% |
| <i>Methanobrevibacter</i> | 8.7 ± 1.3%  | 86.6 ± 2.5% | 3.1 ± 0.5%  | 11.9 ± 1.3% | 14.7 ± 0.3% | 97.4 ± 0.6%  | 14.4 ± 0.4% | 96.8 ± 1.9% |
| <i>Enterococcus</i>       | 13.1 ± 1.3% | 86.3 ± 3.0% | 2.0 ± 0.6%  | 9.6 ± 2.6%  | 14.5 ± 1.3% | 95.3 ± 1.9%  | 13.9 ± 1.3% | 94.3 ± 1.2% |
| <i>Planctomyces</i>       | 5.4 ± 0.7%  | 60.8 ± 5.5% | 5.8 ± 0.6%  | 17.5 ± 1.6% | 14.2 ± 0.3% | 95.2 ± 1.1%  | 12.7 ± 0.6% | 94.2 ± 1.2% |
| <i>Salmonella</i>         | 30.0 ± 1.3% | 77.2 ± 1.4% | 11.9 ± 0.6% | 33.7 ± 3.0% | 13.0 ± 1.1% | 87.5 ± 3.4%  | 13.0 ± 1.0% | 87.9 ± 3.1% |
| <i>Arthrobacter</i>       | 10.3 ± 0.6% | 51.3 ± 3.3% | 4.6 ± 0.6%  | 5.1 ± 0.5%  | 13.0 ± 0.4% | 76.7 ± 2.4%  | 12.7 ± 0.5% | 74.8 ± 3.0% |

|                          |             |             |             |             |             |             |             |             |
|--------------------------|-------------|-------------|-------------|-------------|-------------|-------------|-------------|-------------|
| <i>Marinomonas</i>       | 25.5 ± 1.6% | 82.3 ± 1.5% | 4.2 ± 0.7%  | 11.8 ± 1.4% | 11.4 ± 0.8% | 88.4 ± 3.5% | 32.1 ± 0.9% | 93.4 ± 1.4% |
| <i>Rhodobacter</i>       | 10.1 ± 0.7% | 78.6 ± 2.2% | 7.7 ± 1.2%  | 20.1 ± 2.5% | 10.2 ± 1.4% | 90.4 ± 3.3% | 9.6 ± 0.8%  | 88.7 ± 3.5% |
| <i>Alkaliphilus</i>      | 6.1 ± 0.7%  | 70.8 ± 2.7% | 2.3 ± 0.4%  | 11.5 ± 1.9% | 9.6 ± 0.4%  | 86.6 ± 3.2% | 9.4 ± 0.7%  | 85.5 ± 2.5% |
| <i>Propionibacterium</i> | 6.4 ± 0.9%  | 78.9 ± 5.6% | 0.9 ± 0.3%  | 4.3 ± 1.4%  | 8.8 ± 1.2%  | 95.0 ± 1.6% | 8.4 ± 1.3%  | 93.5 ± 2.7% |
| <i>Cellulomonas</i>      | 30.7 ± 1.1% | 85.1 ± 1.7% | 62.6 ± 1.3% | 62.9 ± 2.0% | 8.6 ± 0.8%  | 89.0 ± 2.9% | 32.6 ± 1.3% | 94.1 ± 1.4% |
| <i>Blattabacterium</i>   | 57.8 ± 1.2% | 98.3 ± 0.5% | 40.5 ± 1.2% | 39.5 ± 0.4% | 8.5 ± 0.7%  | 99.8 ± 0.5% | 71.6 ± 1.5% | 99.8 ± 0.1% |
| <i>Nitrosococcus</i>     | 35.5 ± 1.5% | 90.5 ± 1.5% | 8.7 ± 1.0%  | 21.2 ± 1.4% | 7.7 ± 0.9%  | 86.8 ± 1.5% | 41.5 ± 0.7% | 95.2 ± 0.6% |
| <i>Chlorobium</i>        | 10.4 ± 1.3% | 21.8 ± 2.5% | 9.3 ± 0.8%  | 9.6 ± 0.8%  | 7.4 ± 0.9%  | 22.9 ± 1.9% | 7.9 ± 1.4%  | 24.2 ± 3.2% |
| <i>Eubacterium</i>       | 6.4 ± 1.2%  | 57.3 ± 3.2% | 6.9 ± 1.5%  | 13.2 ± 2.6% | 6.5 ± 0.6%  | 74.5 ± 2.9% | 6.4 ± 0.4%  | 71.9 ± 5.4% |
| <i>Chlamydia</i>         | 14.2 ± 1.3% | 20.7 ± 1.3% | 22.1 ± 3.3% | 12.5 ± 1.5% | 6.2 ± 0.9%  | 19.5 ± 2.4% | 8.6 ± 0.7%  | 25.7 ± 1.2% |
| <i>Porphyromonas</i>     | 4.7 ± 0.9%  | 77.6 ± 6.8% | 2.3 ± 0.5%  | 11.8 ± 2.4% | 5.9 ± 1.1%  | 92.5 ± 3.8% | 5.6 ± 1.1%  | 89.7 ± 3.5% |
| <i>Agrobacterium</i>     | 7.9 ± 0.5%  | 42.0 ± 1.9% | 4.8 ± 0.5%  | 8.8 ± 0.8%  | 4.4 ± 0.6%  | 42.8 ± 1.3% | 4.4 ± 0.6%  | 41.7 ± 0.7% |
| <i>Thermoproteus</i>     | 4.2 ± 0.2%  | 52.4 ± 4.1% | 19.4 ± 0.6% | 41.8 ± 1.5% | 3.6 ± 0.4%  | 74.5 ± 6.5% | 3.5 ± 0.4%  | 67.0 ± 9.0% |
| <i>Actinobacillus</i>    | 4.6 ± 0.7%  | 40.6 ± 4.3% | 13.8 ± 1.3% | 32.1 ± 2.0% | 3.5 ± 0.8%  | 59.5 ± 7.7% | 3.3 ± 0.7%  | 57.9 ± 6.9% |
| <i>Spirochaeta</i>       | 2.8 ± 0.7%  | 21.4 ± 6.2% | 2.8 ± 0.3%  | 2.5 ± 0.3%  | 2.9 ± 0.6%  | 37.0 ± 4.2% | 2.9 ± 0.6%  | 36.3 ± 4.7% |
| <i>Pseudoxanthomonas</i> | 5.5 ± 0.7%  | 71.9 ± 4.0% | 10.9 ± 0.9% | 25.6 ± 1.3% | 2.9 ± 0.7%  | 77.1 ± 3.8% | 3.0 ± 0.5%  | 79.7 ± 5.2% |
| <i>Pseudoalteromonas</i> | 3.2 ± 0.6%  | 49.7 ± 6.0% | 3.9 ± 0.3%  | 8.7 ± 0.5%  | 2.8 ± 0.6%  | 67.0 ± 7.3% | 2.8 ± 0.6%  | 65.9 ± 7.3% |
| <i>Pelodictyon</i>       | 3.5 ± 0.4%  | 36.4 ± 5.2% | 1.2 ± 0.2%  | 4.2 ± 0.5%  | 2.3 ± 0.5%  | 33.2 ± 4.0% | 2.5 ± 0.4%  | 33.8 ± 3.3% |
| <i>Escherichia</i>       | 4.1 ± 0.9%  | 37.8 ± 4.1% | 8.2 ± 0.9%  | 22.0 ± 2.3% | 2.0 ± 0.4%  | 39.7 ± 5.7% | 2.0 ± 0.4%  | 38.4 ± 5.4% |
| <i>Pelobacter</i>        | 1.3 ± 0.3%  | 31.6 ± 4.5% | 0.9 ± 0.2%  | 3.7 ± 0.9%  | 1.7 ± 0.2%  | 60.6 ± 4.5% | 1.4 ± 0.4%  | 55.5 ± 5.3% |
| <i>Citrobacter</i>       | 6.5 ± 0.5%  | 45.3 ± 4.3% | 5.2 ± 0.7%  | 14.6 ± 1.7% | 1.3 ± 0.3%  | 24.9 ± 5.9% | 1.3 ± 0.2%  | 24.0 ± 3.4% |

**Supplementary Table S2.** Species-mask comparison of MetaCV, Phymm, BlastX and RAPSearch2 on the classification of simulated reads with length ranging from 100 bp to 1 kb from 154 genera. Evaluations are performed on levels of genus, family order class and phylum.

| Genus         | MetaCV      |             | Phymm       |             | BlastX+Megan |             | RAPSearch2+Megan |             |
|---------------|-------------|-------------|-------------|-------------|--------------|-------------|------------------|-------------|
|               | Sensitivity | Specificity | Sensitivity | Specificity | Sensitivity  | Specificity | Sensitivity      | Specificity |
| 100 bp        | 41.5 + 0.1% | 80.0 + 0.2% | 24.3 + 0.1% | 26.4 + 0.1% | 41.4 + 0.1%  | 87.1 ± 0.2% | 41.7 ± 0.1%      | 86.5 ± 0.1% |
| 200 bp        | 51.9 + 0.0% | 82.0 + 0.1% | 37.3 + 0.1% | 40.5 + 0.1% | 50.8 + 0.1%  | 85.4 ± 0.1% | 51.5 ± 0.1%      | 85.4 ± 0.1% |
| 400 bp        | 60.4 + 0.1% | 82.3 + 0.1% | 49.5 + 0.1% | 54.2 + 0.1% | 56.8 + 0.1%  | 84.6 ± 0.2% | 57.9 ± 0.2%      | 84.4 ± 0.2% |
| 600 bp        | 63.6 + 0.1% | 84.2 + 0.1% | 55.9 + 0.1% | 61.0 + 0.2% | 59.2 + 0.2%  | 84.8 ± 0.2% | 60.5 ± 0.2%      | 84.2 ± 0.1% |
| 800 bp        | 66.0 + 0.1% | 83.9 + 0.2% | 59.8 + 0.1% | 64.9 + 0.1% | 60.4 + 0.1%  | 84.2 ± 1.4% | 61.8 ± 0.1%      | 84.2 ± 0.2% |
| 1000 bp       | 67.1 + 0.1% | 85.4 + 0.1% | 62.4 + 0.1% | 67.3 + 0.1% | 61.1 + 0.1%  | 85.1 ± 0.1% | 62.7 ± 0.1%      | 84.3 ± 0.2% |
| <b>Family</b> |             |             |             |             |              |             |                  |             |
| 100 bp        | 45.6 + 0.2% | 85.4 + 0.2% | 27.0 + 0.1% | 27.8 + 0.1% | 50.3 ± 0.1%  | 93.0 ± 0.2% | 49.8 ± 0.1%      | 92.5 ± 0.1% |
| 200 bp        | 56.3 + 0.1% | 87.3 + 0.1% | 40.4 + 0.1% | 42.6 + 0.1% | 61.2 ± 0.1%  | 91.0 ± 0.1% | 61.1 ± 0.1%      | 91.2 ± 0.1% |
| 400 bp        | 65.2 + 0.1% | 87.6 + 0.2% | 53.2 + 0.1% | 56.6 + 0.1% | 68.2 ± 0.1%  | 90.3 ± 0.2% | 68.4 ± 0.1%      | 90.3 ± 0.2% |
| 600 bp        | 68.6 + 0.1% | 89.7 + 0.1% | 59.9 + 0.2% | 63.5 + 0.3% | 70.7 ± 0.1%  | 90.5 ± 0.1% | 71.3 ± 0.1%      | 90.0 ± 0.1% |
| 800 bp        | 71.3 + 0.1% | 89.4 + 0.1% | 64.0 + 0.1% | 67.5 + 0.1% | 71.3 ± 1.6%  | 90.0 ± 1.1% | 72.7 ± 0.1%      | 90.0 ± 0.1% |
| 1000 bp       | 72.5 + 0.1% | 91.0 + 0.1% | 66.6 + 0.2% | 70.0 + 0.2% | 73.1 ± 0.1%  | 90.8 ± 0.1% | 73.9 ± 0.1%      | 90.1 ± 0.1% |
| <b>Order</b>  |             |             |             |             |              |             |                  |             |
| 100 bp        | 46.7 + 0.2% | 89.8 + 0.1% | 28.5 + 0.1% | 32.8 + 0.1% | 54.7 ± 0.1%  | 95.9 ± 0.1% | 53.6 ± 0.2%      | 95.7 ± 0.1% |
| 200 bp        | 58.4 + 0.1% | 91.3 + 0.2% | 42.7 + 0.1% | 49.1 + 0.1% | 66.6 ± 0.1%  | 94.3 ± 0.1% | 65.6 ± 0.1%      | 94.4 ± 0.1% |
| 400 bp        | 68.2 + 0.2% | 91.4 + 0.1% | 56.6 + 0.1% | 64.0 + 0.2% | 73.9 ± 0.1%  | 93.6 ± 0.1% | 73.4 ± 0.1%      | 93.7 ± 0.0% |
| 600 bp        | 71.8 + 0.1% | 93.1 + 0.1% | 63.8 + 0.1% | 71.0 + 0.3% | 76.5 ± 0.1%  | 93.6 ± 0.1% | 76.3 ± 0.1%      | 93.5 ± 0.1% |
| 800 bp        | 74.9 + 0.1% | 92.8 + 0.1% | 68.3 + 0.2% | 75.0 + 0.1% | 77.0 ± 2.1%  | 93.3 ± 0.6% | 77.9 ± 0.0%      | 93.4 ± 0.1% |
| 1000 bp       | 76.1 + 0.1% | 94.2 + 0.1% | 71.2 + 0.2% | 77.5 + 0.2% | 79.0 ± 0.1%  | 93.9 ± 0.0% | 79.1 ± 0.2%      | 93.5 ± 0.1% |
| <b>Class</b>  |             |             |             |             |              |             |                  |             |
| 100 bp        | 43.8 + 0.1% | 91.2 + 0.2% | 30.2 + 0.1% | 34.9 + 0.2% | 55.0 ± 0.1%  | 96.9 ± 0.1% | 54.3 ± 0.1%      | 96.7 ± 0.1% |
| 200 bp        | 56.0 + 0.1% | 92.7 + 0.2% | 43.2 + 0.1% | 51.9 + 0.1% | 67.8 ± 0.1%  | 95.5 ± 0.1% | 66.8 ± 0.1%      | 95.6 ± 0.0% |
| 400 bp        | 66.4 + 0.2% | 93.0 + 0.1% | 56.0 + 0.1% | 67.2 + 0.2% | 75.1 ± 0.1%  | 94.8 ± 0.1% | 74.6 ± 0.2%      | 95.1 ± 0.1% |
| 600 bp        | 70.2 + 0.1% | 94.6 + 0.2% | 62.9 + 0.2% | 74.3 + 0.5% | 77.7 ± 0.2%  | 94.8 ± 0.1% | 77.7 ± 0.1%      | 94.8 ± 0.1% |
| 800 bp        | 73.7 + 0.2% | 94.5 + 0.1% | 67.3 + 0.2% | 78.3 + 0.2% | 78.3 ± 2.1%  | 94.9 ± 0.2% | 79.4 ± 0.2%      | 94.8 ± 0.1% |
| 1000 bp       | 75.0 + 0.1% | 95.7 + 0.1% | 70.0 + 0.2% | 80.7 + 0.2% | 80.3 ± 0.1%  | 95.1 ± 0.0% | 80.7 ± 0.1%      | 94.9 ± 0.1% |

| <u>Phylum</u> |             |             |             |             |             |             |             |             |  |
|---------------|-------------|-------------|-------------|-------------|-------------|-------------|-------------|-------------|--|
| 100 bp        | 45.9 + 0.2% | 92.4 + 0.3% | 35.2 + 0.2% | 39.5 + 0.2% | 59.0 ± 0.1% | 98.1 ± 0.1% | 58.0 ± 0.1% | 97.9 ± 0.1% |  |
| 200 bp        | 58.7 + 0.1% | 93.9 + 0.4% | 48.4 + 0.1% | 57.6 + 0.3% | 72.2 ± 0.2% | 97.0 ± 0.2% | 70.9 ± 0.2% | 97.2 ± 0.1% |  |
| 400 bp        | 69.2 + 0.2% | 94.5 + 0.1% | 61.2 + 0.1% | 73.5 + 0.2% | 79.6 ± 0.1% | 96.4 ± 0.1% | 78.7 ± 0.2% | 96.8 ± 0.1% |  |
| 600 bp        | 73.1 + 0.1% | 96.1 + 0.2% | 68.5 + 0.4% | 80.7 + 0.4% | 82.4 ± 0.2% | 96.5 ± 0.1% | 82.0 ± 0.2% | 96.6 ± 0.1% |  |
| 800 bp        | 76.5 + 0.1% | 96.0 + 0.1% | 72.9 + 0.2% | 84.5 + 0.1% | 82.6 ± 2.6% | 96.7 ± 0.1% | 83.6 ± 0.2% | 96.7 ± 0.0% |  |
| 1000 bp       | 77.5 + 0.1% | 97.2 + 0.2% | 75.8 + 0.2% | 87.0 + 0.2% | 84.7 ± 0.2% | 96.8 ± 0.1% | 84.8 ± 0.2% | 96.8 ± 0.1% |  |

**Supplementary Table S3.** Performance comparison of MetaCV, Phymm, BlastX and RAPSearch2 on the classification of “randomized metagenomic” data sets. Phymm and BlastX were applied to 100 bp simulated reads while MetaCV was also applied to all reads of various lengths. Evaluations are performed on levels of genus, family, order, class and phylum.

| Genus         | MetaCV      |             | Phymm       |             | BlastX+Megan |             | RAPSearch2+Megan |             |
|---------------|-------------|-------------|-------------|-------------|--------------|-------------|------------------|-------------|
|               | Sensitivity | Specificity | Sensitivity | Specificity | Sensitivity  | Specificity | Sensitivity      | Specificity |
| 100 bp        | 58.4 ± 0.0% | 89.3 ± 0.1% | 28.3 ± 0.1% | 46.4 ± 0.1% | 61.0 ± 0.4%  | 93.7 ± 0.1% | 60.4 ± 0.0%      | 93.3 ± 0.1% |
| 200 bp        | 61.5 ± 0.1% | 88.3 ± 0.1% | -           | -           | -            | -           | -                | -           |
| 400 bp        | 60.8 ± 0.1% | 85.2 ± 0.0% | -           | -           | -            | -           | -                | -           |
| 600 bp        | 60.3 ± 0.0% | 83.9 ± 0.1% | -           | -           | -            | -           | -                | -           |
| 800 bp        | 57.5 ± 0.1% | 81.1 ± 0.1% | -           | -           | -            | -           | -                | -           |
| 1000 bp       | 57.5 ± 0.0% | 81.0 ± 0.1% | -           | -           | -            | -           | -                | -           |
| <b>Family</b> |             |             |             |             |              |             |                  |             |
| 100 bp        | 52.4 ± 0.1% | 88.6 ± 0.1% | 32.6 ± 0.0% | 40.5 ± 0.1% | 55.0 ± 0.3%  | 94.7 ± 0.0% | 54.4 ± 0.0%      | 94.2 ± 0.1% |
| 200 bp        | 59.5 ± 0.1% | 88.4 ± 0.0% | -           | -           | -            | -           | -                | -           |
| 400 bp        | 64.5 ± 0.1% | 85.1 ± 0.1% | -           | -           | -            | -           | -                | -           |
| 600 bp        | 66.2 ± 0.0% | 83.7 ± 0.0% | -           | -           | -            | -           | -                | -           |
| 800 bp        | 66.5 ± 0.1% | 80.3 ± 0.1% | -           | -           | -            | -           | -                | -           |
| 1000 bp       | 67.1 ± 0.1% | 80.2 ± 0.1% | -           | -           | -            | -           | -                | -           |
| <b>Order</b>  |             |             |             |             |              |             |                  |             |
| 100 bp        | 52.9 ± 0.1% | 89.2 ± 0.1% | 39.0 ± 0.1% | 43.1 ± 0.0% | 56.5 ± 0.4%  | 95.7 ± 0.0% | 55.9 ± 0.1%      | 95.3 ± 0.0% |
| 200 bp        | 61.1 ± 0.1% | 89.4 ± 0.1% | -           | -           | -            | -           | -                | -           |
| 400 bp        | 67.9 ± 0.1% | 86.3 ± 0.1% | -           | -           | -            | -           | -                | -           |
| 600 bp        | 70.3 ± 0.1% | 85.0 ± 0.0% | -           | -           | -            | -           | -                | -           |
| 800 bp        | 71.7 ± 0.1% | 81.3 ± 0.1% | -           | -           | -            | -           | -                | -           |
| 1000 bp       | 72.4 ± 0.0% | 81.2 ± 0.1% | -           | -           | -            | -           | -                | -           |
| <b>Class</b>  |             |             |             |             |              |             |                  |             |
| 100 bp        | 53.1 ± 0.1% | 90.4 ± 0.1% | 44.6 ± 0.1% | 48.1 ± 0.0% | 59.0 ± 0.4%  | 96.5 ± 0.0% | 58.5 ± 0.1%      | 96.1 ± 0.0% |
| 200 bp        | 61.7 ± 0.1% | 90.9 ± 0.0% | -           | -           | -            | -           | -                | -           |
| 400 bp        | 69.3 ± 0.1% | 88.2 ± 0.1% | -           | -           | -            | -           | -                | -           |
| 600 bp        | 71.9 ± 0.1% | 86.9 ± 0.0% | -           | -           | -            | -           | -                | -           |
| 800 bp        | 73.8 ± 0.1% | 83.4 ± 0.0% | -           | -           | -            | -           | -                | -           |
| 1000 bp       | 74.5 ± 0.0% | 83.3 ± 0.1% | -           | -           | -            | -           | -                | -           |

| Phylum  |             |             |             |             |             |             |             |             |
|---------|-------------|-------------|-------------|-------------|-------------|-------------|-------------|-------------|
| 100 bp  | 55.2 ± 0.1% | 92.6 ± 0.0% | 54.9 ± 0.0% | 56.5 ± 0.0% | 62.1 ± 0.4% | 97.5 ± 0.0% | 61.6 ± 0.1% | 97.3 ± 0.0% |
| 200 bp  | 64.4 ± 0.1% | 93.2 ± 0.0% | -           | -           | -           | -           | -           | -           |
| 400 bp  | 73.2 ± 0.1% | 90.9 ± 0.1% | -           | -           | -           | -           | -           | -           |
| 600 bp  | 76.4 ± 0.0% | 89.7 ± 0.0% | -           | -           | -           | -           | -           | -           |
| 800 bp  | 79.2 ± 0.1% | 86.4 ± 0.0% | -           | -           | -           | -           | -           | -           |
| 1000 bp | 80.0 ± 0.0% | 86.2 ± 0.0% | -           | -           | -           | -           | -           | -           |



**Supplementary Table S4.** A list of 44 most abundant genera by MetaCV on 109 cohorts of human gut samples. Cohorts which have over 400 matched reads per million raw sequences are counted. “Meta-HIT” has 13 genera with at least one whole-genome-sequenced (WGS) species summarized by Qin et al., all of them are detected by MetaCV (marked with “Y”). In addition, another 14 genera were further proved as gut-associated bacteria by “HMP” (Human Microbiome Project of NIH), and were marked with “Y”.

| Genus                     | Ave. read num<br>per million | Num of<br>cohorts | Meta-HIT | HMP |
|---------------------------|------------------------------|-------------------|----------|-----|
| <i>Bacteroides</i>        | 128,113                      | 109               | Y        | Y   |
| <i>Eubacterium</i>        | 36,196                       | 109               | Y        | Y   |
| <i>Roseburia</i>          | 17,091                       | 109               | Y        | Y   |
| <i>Prevotella</i>         | 16,382                       | 109               | Y        | Y   |
| <i>Clostridium</i>        | 16,315                       | 109               | Y        | Y   |
| <i>Parabacteroides</i>    | 13,490                       | 109               | Y        | Y   |
| <i>Odoribacter</i>        | 5,862                        | 109               | -        | Y   |
| <i>Oscillibacter</i>      | 4,922                        | 109               | -        | -   |
| <i>Bifidobacterium</i>    | 4,195                        | 107               | Y        | Y   |
| <i>Escherichia</i>        | 3,521                        | 45                | Y        | Y   |
| <i>Butyrivibrio</i>       | 3,073                        | 109               | Y        | Y   |
| <i>Ruminococcus</i>       | 2,868                        | 109               | Y        | Y   |
| <i>Streptococcus</i>      | 2,774                        | 109               | Y        | Y   |
| <i>Akkermansia</i>        | 2,550                        | 49                | Y        | -   |
| <i>Acidaminococcus</i>    | 2,379                        | 108               | -        | Y   |
| <i>Tannerella</i>         | 2,012                        | 109               | -        | Y   |
| <i>Lactobacillus</i>      | 2,011                        | 108               | -        | Y   |
| <i>Treponema</i>          | 1,672                        | 109               | -        | -   |
| <i>Ethanoligenens</i>     | 1,290                        | 101               | -        | -   |
| <i>Porphyromonas</i>      | 1,281                        | 106               | -        | Y   |
| <i>Selenomonas</i>        | 1,211                        | 108               | -        | -   |
| <i>Bacillus</i>           | 1,129                        | 108               | -        | Y   |
| <i>Eggerthella</i>        | 1,005                        | 99                | -        | Y   |
| <i>Cellulosilyticum</i>   | 951                          | 99                | -        | -   |
| <i>Paludibacter</i>       | 870                          | 99                | -        | -   |
| <i>Veillonella</i>        | 781                          | 38                | -        | Y   |
| <i>Paenibacillus</i>      | 695                          | 95                | -        | Y   |
| <i>Megasphaera</i>        | 665                          | 51                | -        | -   |
| <i>Desulfovibrio</i>      | 660                          | 67                | -        | Y   |
| <i>Methanobrevibacter</i> | 627                          | 22                | -        | Y   |
| <i>Enterococcus</i>       | 623                          | 76                | Y        | Y   |
| <i>Desulfotomaculum</i>   | 613                          | 82                | -        | -   |
| <i>Desulfitobacterium</i> | 564                          | 69                | -        | Y   |
| <i>Pedobacter</i>         | 556                          | 66                | -        | -   |
| <i>Burkholderia</i>       | 506                          | 38                | -        | -   |
| <i>Alkaliphilus</i>       | 493                          | 58                | -        | -   |
| <i>Flavobacterium</i>     | 475                          | 39                | -        | -   |
| <i>Spirochaeta</i>        | 473                          | 48                | -        | -   |
| <i>Haemophilus</i>        | 464                          | 15                | -        | -   |
| <i>Slackia</i>            | 452                          | 38                | -        | Y   |
| <i>Acetobacterium</i>     | 448                          | 40                | -        | -   |
| <i>Fibrobacter</i>        | 434                          | 27                | -        | -   |
| <i>Sphaerochaeta</i>      | 432                          | 22                | -        | -   |
| <i>Mycoplasma</i>         | 428                          | 13                | -        | Y   |
